# Supplementary material for: Migration of households from New York City and the Second Peak in Covid-19 cases in New Jersey, Connecticut and New York Counties
Source: bioRxiv or medRxiv preprint supplement (doi:10.1101/2021.03.29.21254583), 2021-03-31

# ATLANTIC

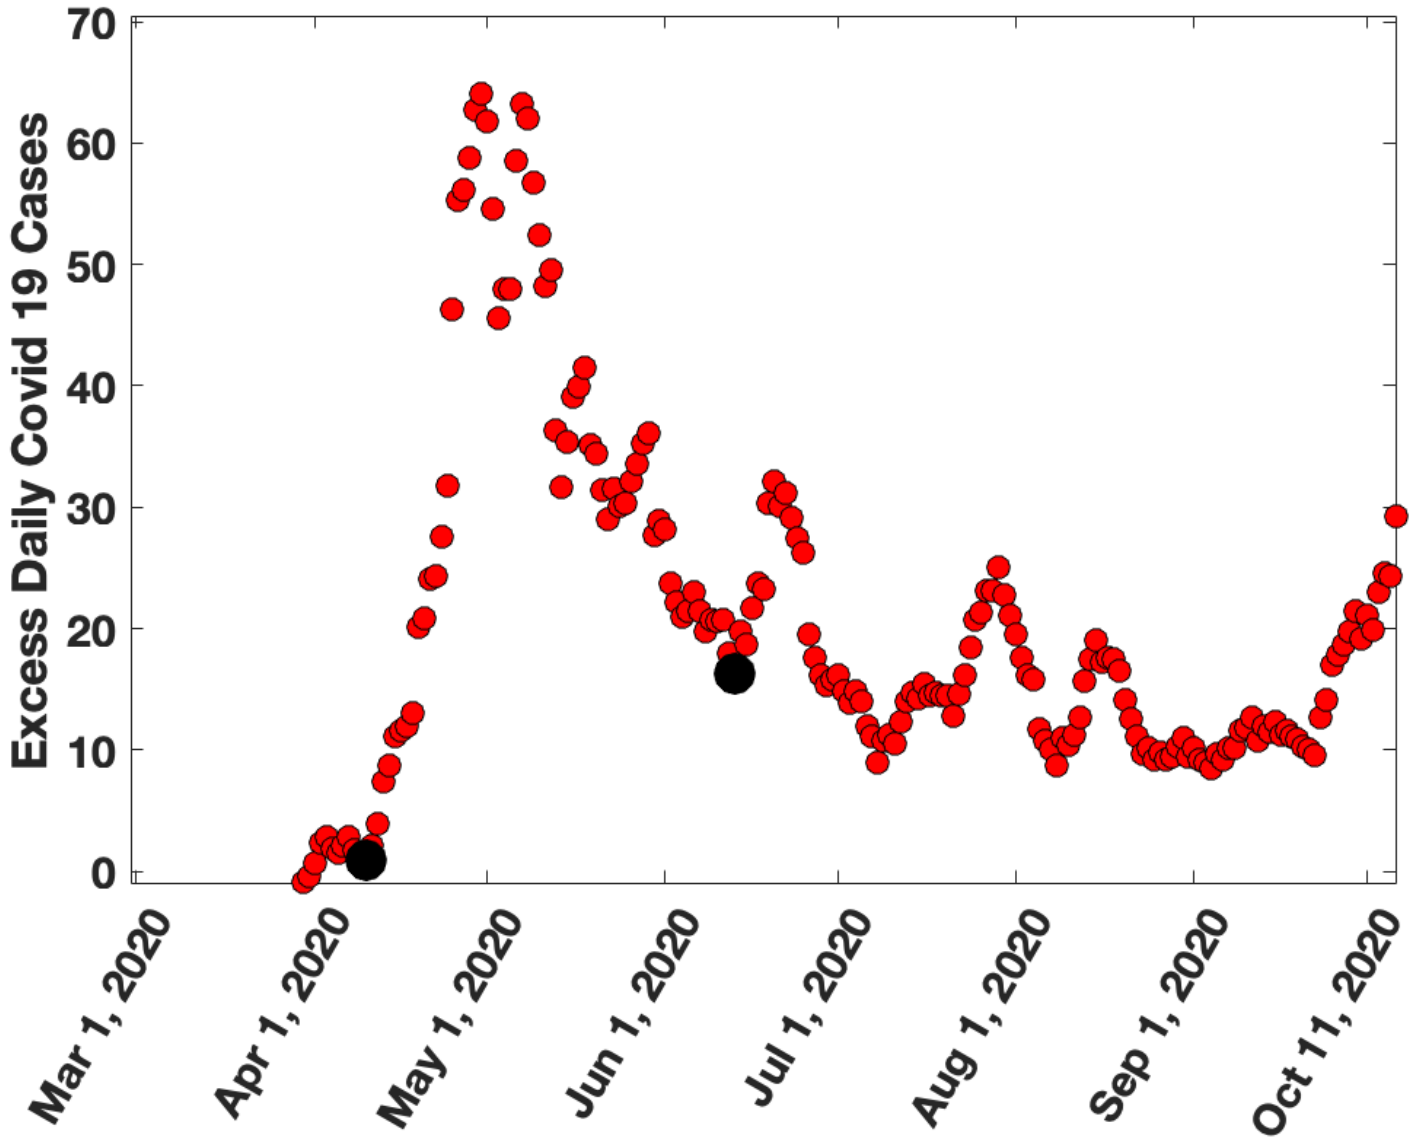

# BERGEN

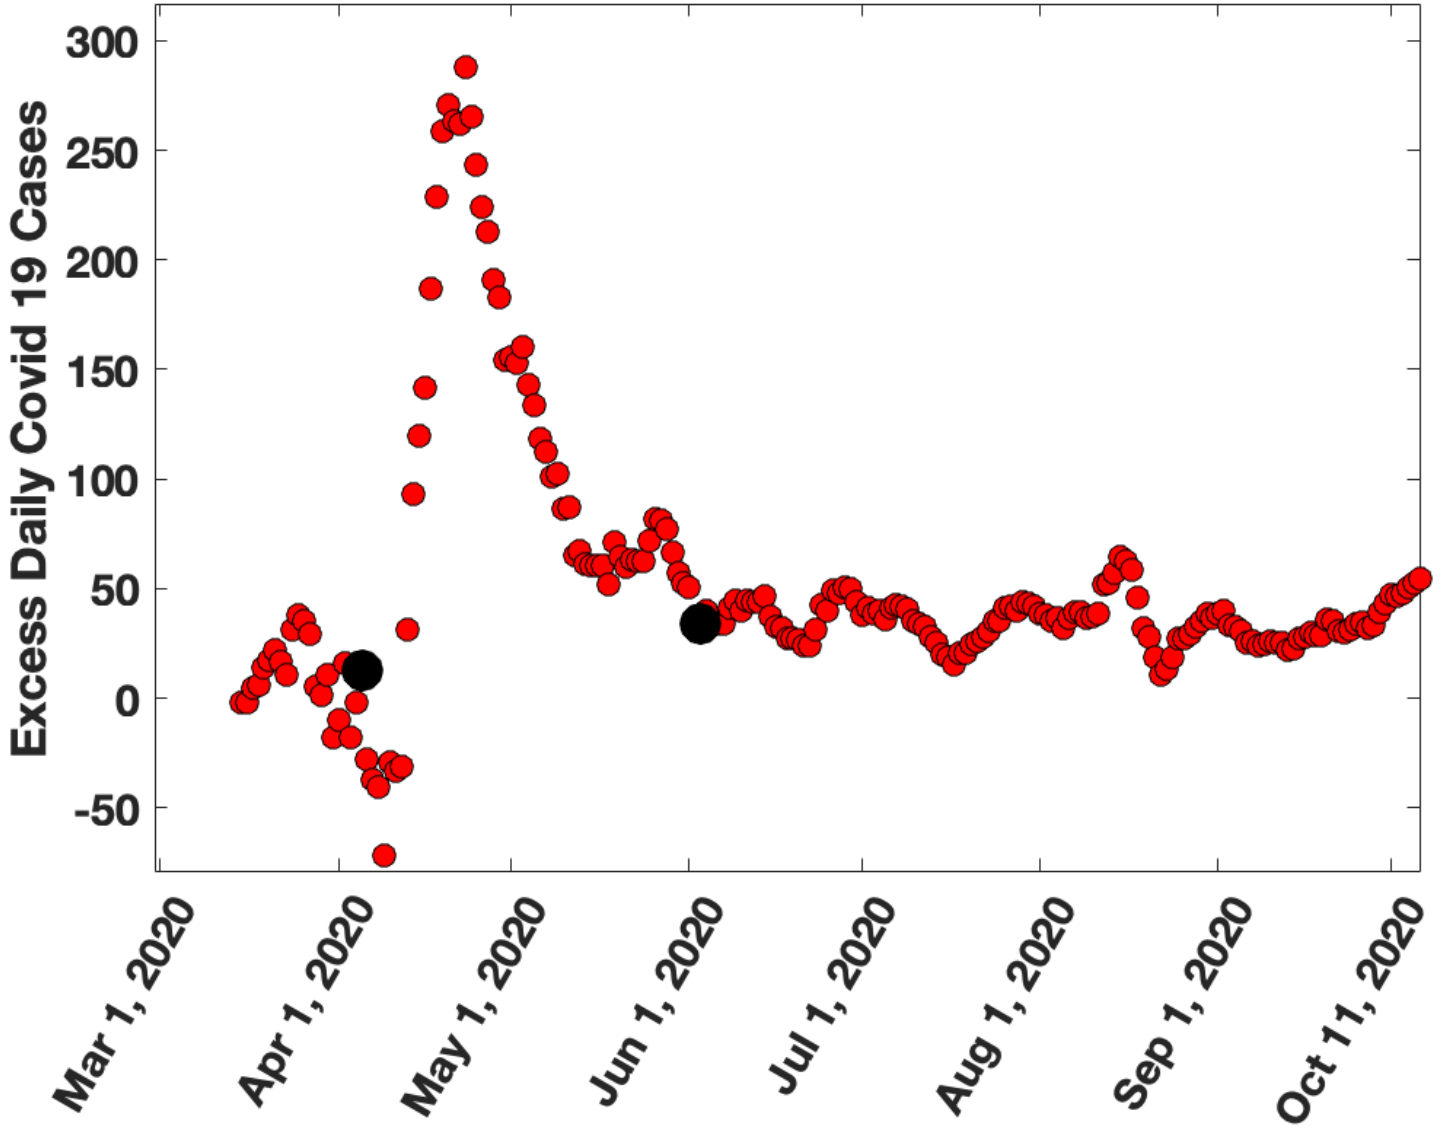

# BURLINGTON

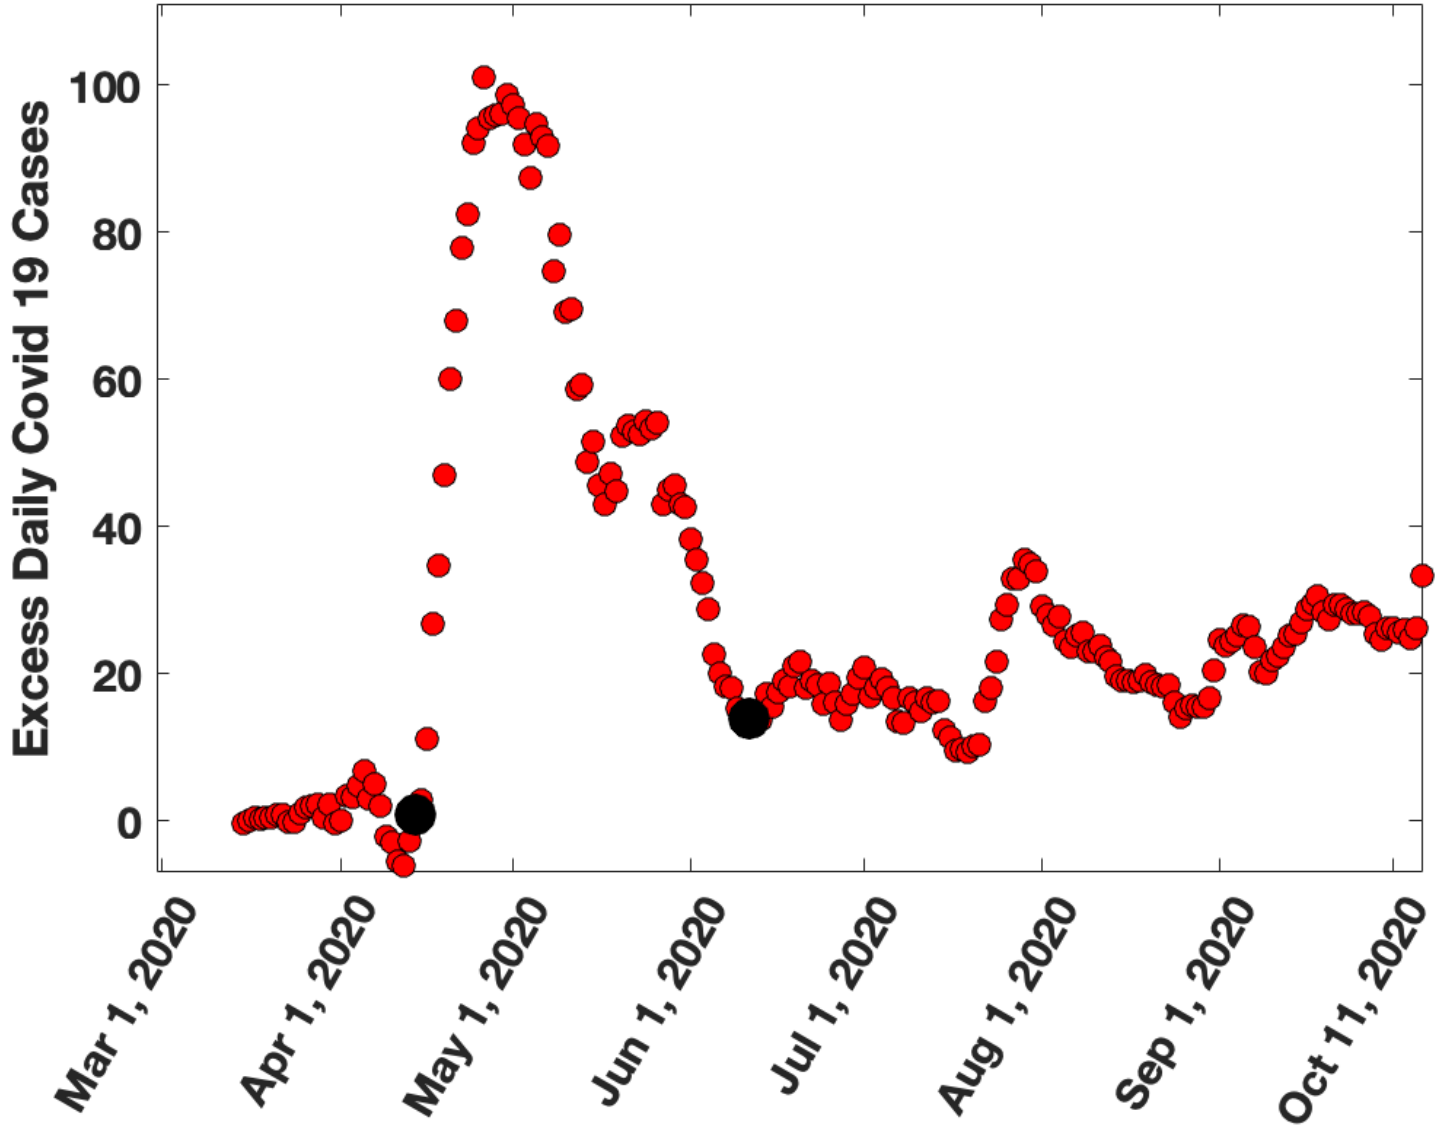

# CAMDEN

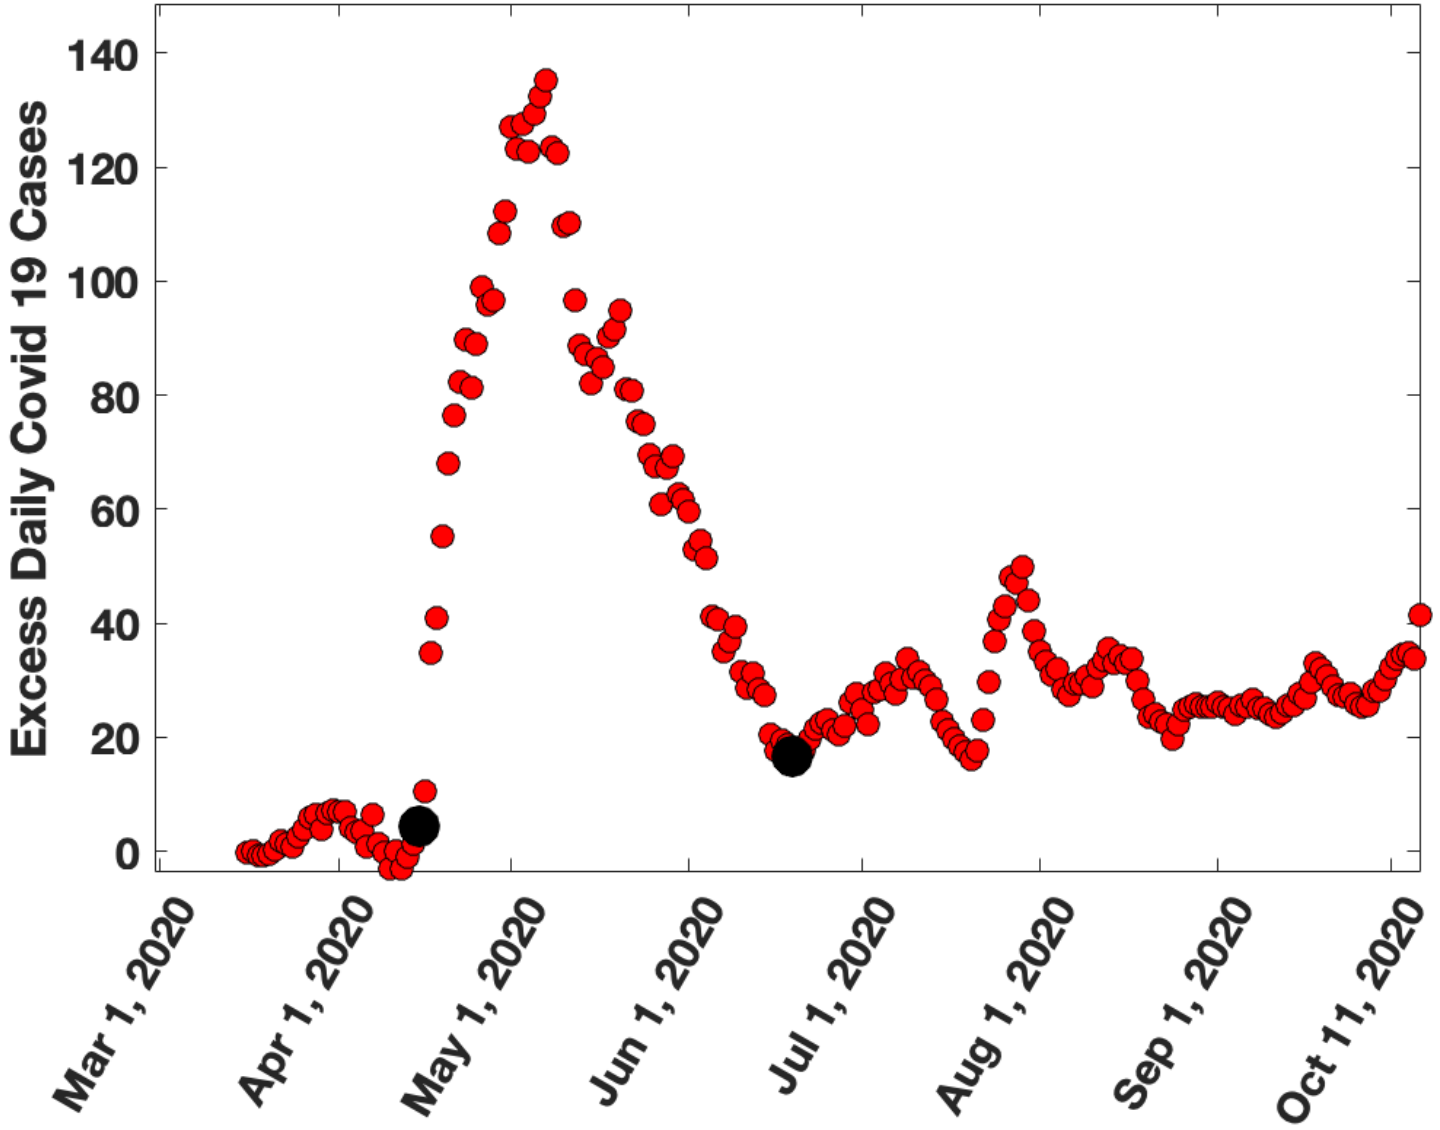

# CAPEMAY

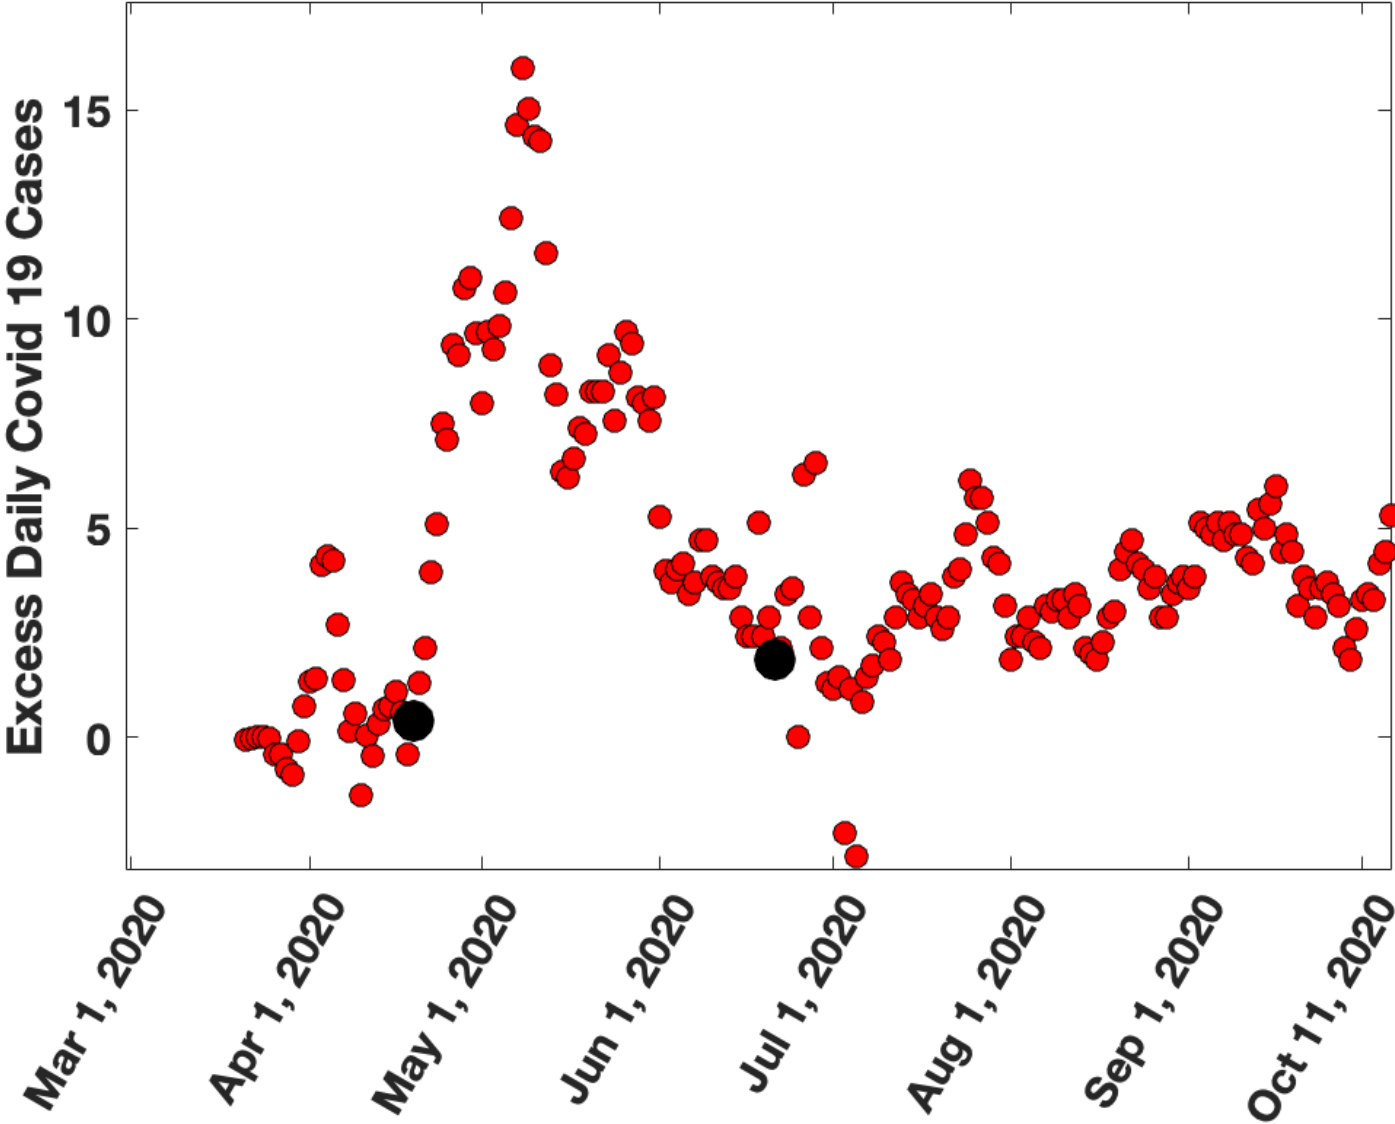

# CUMBERLAND

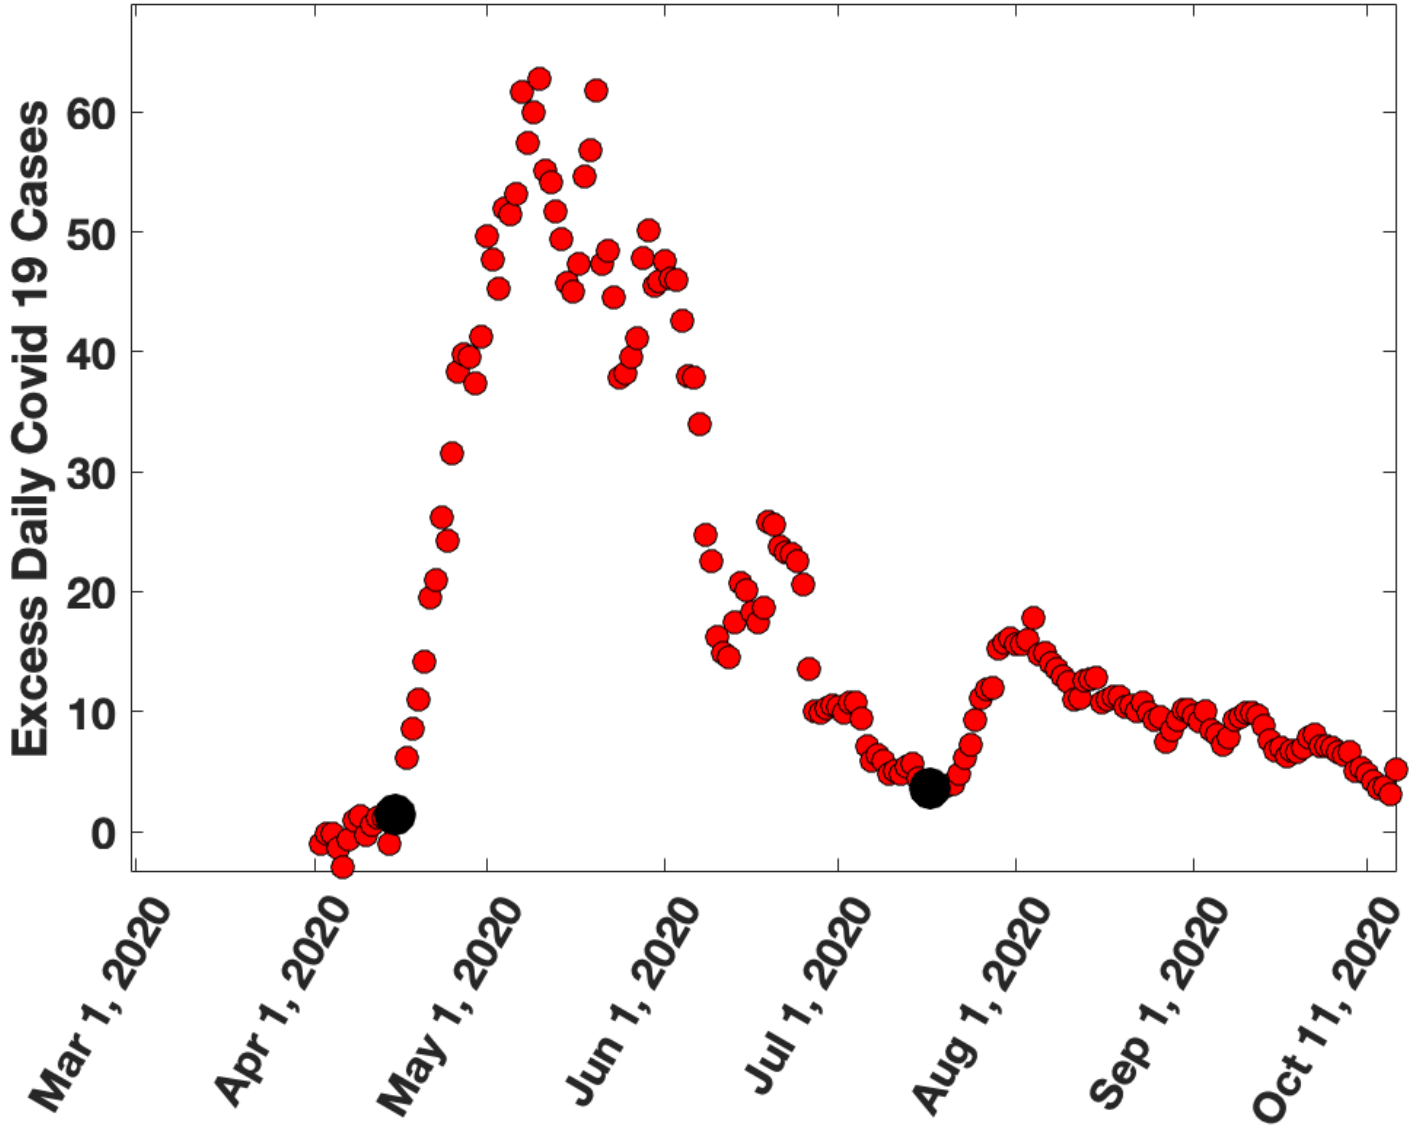

# ESSEX

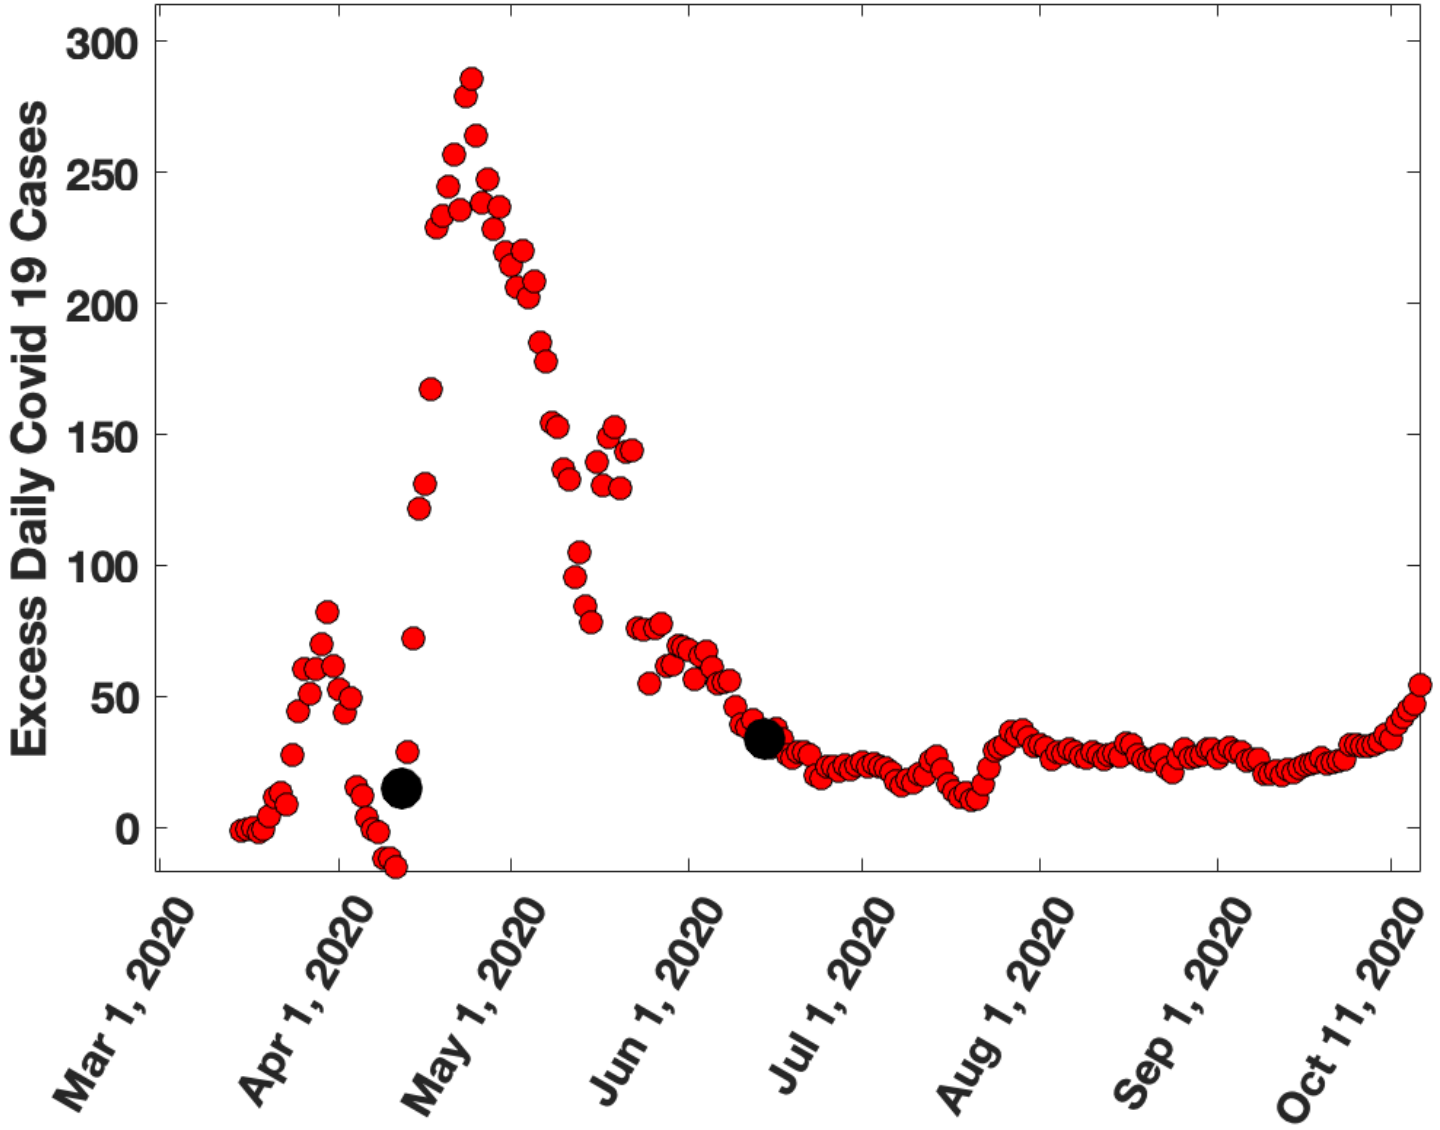

# GLOUCESTER

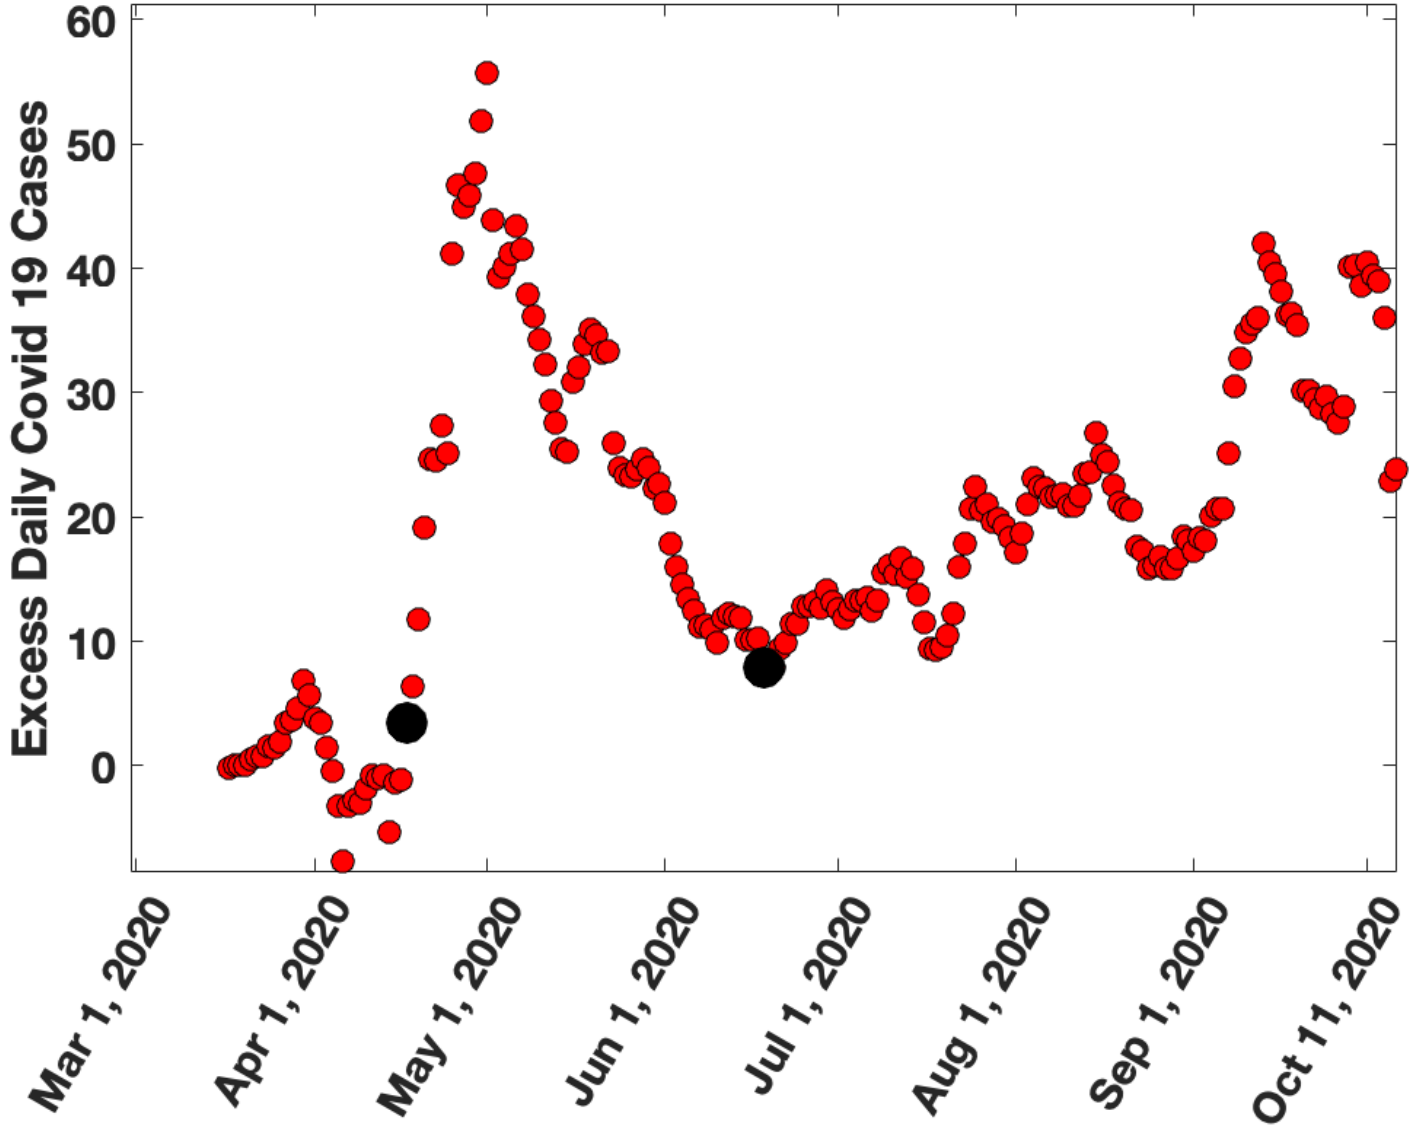



# HUDSON

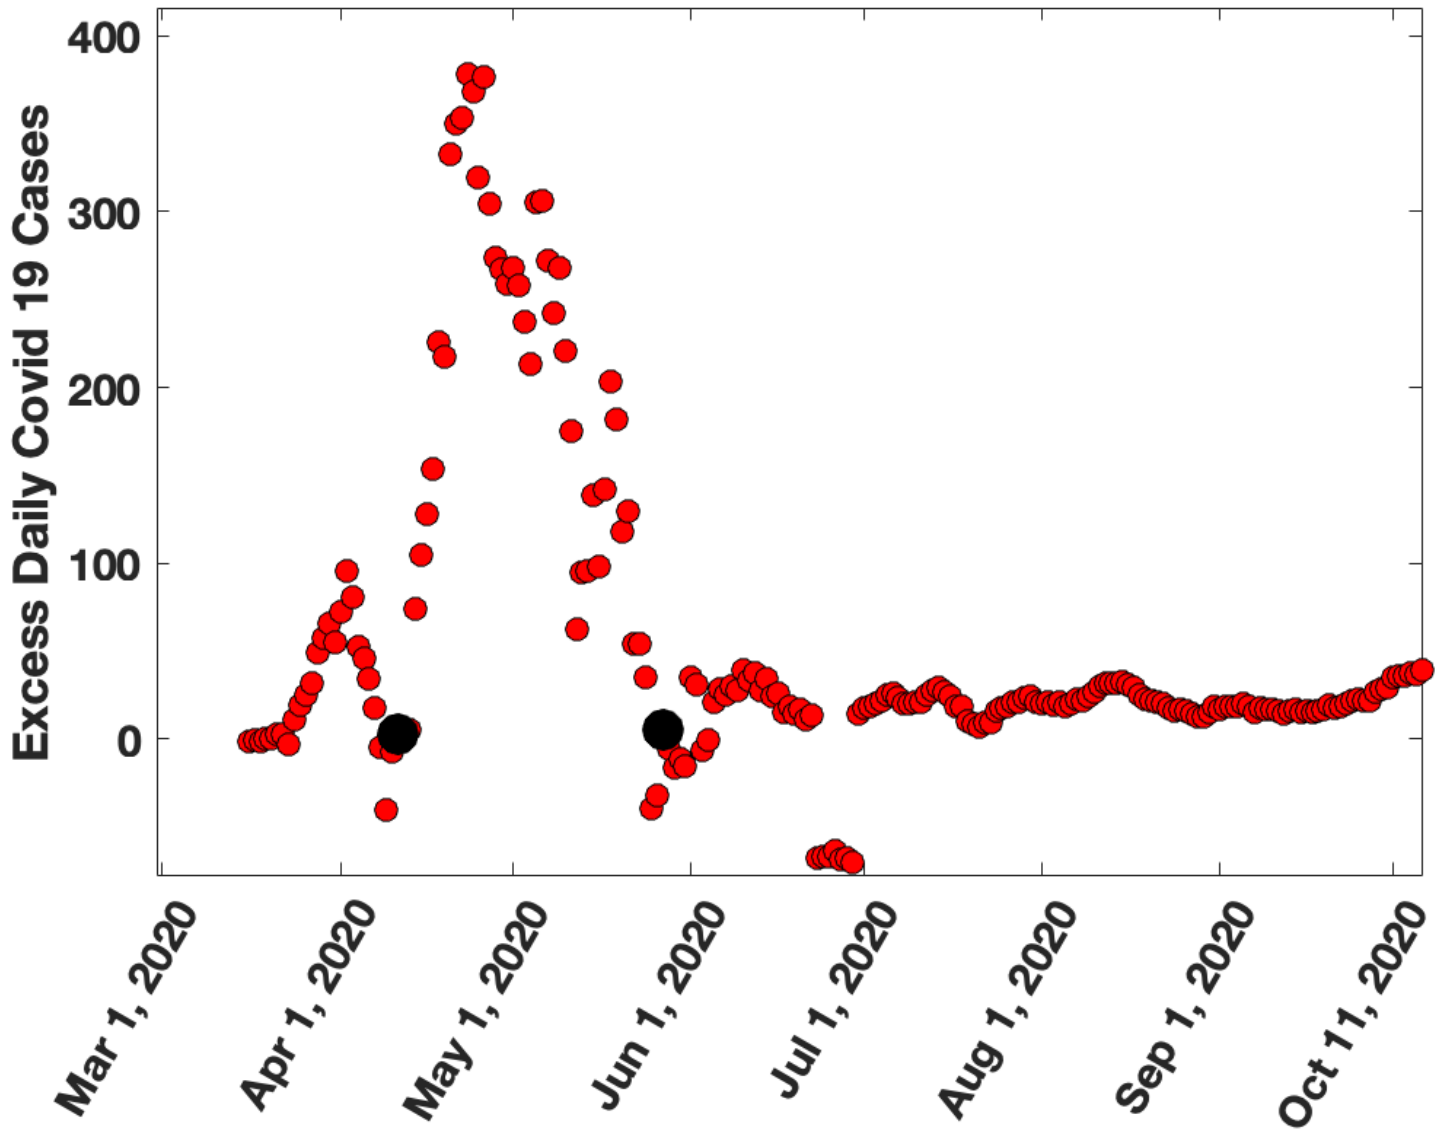

# HUNTERDON

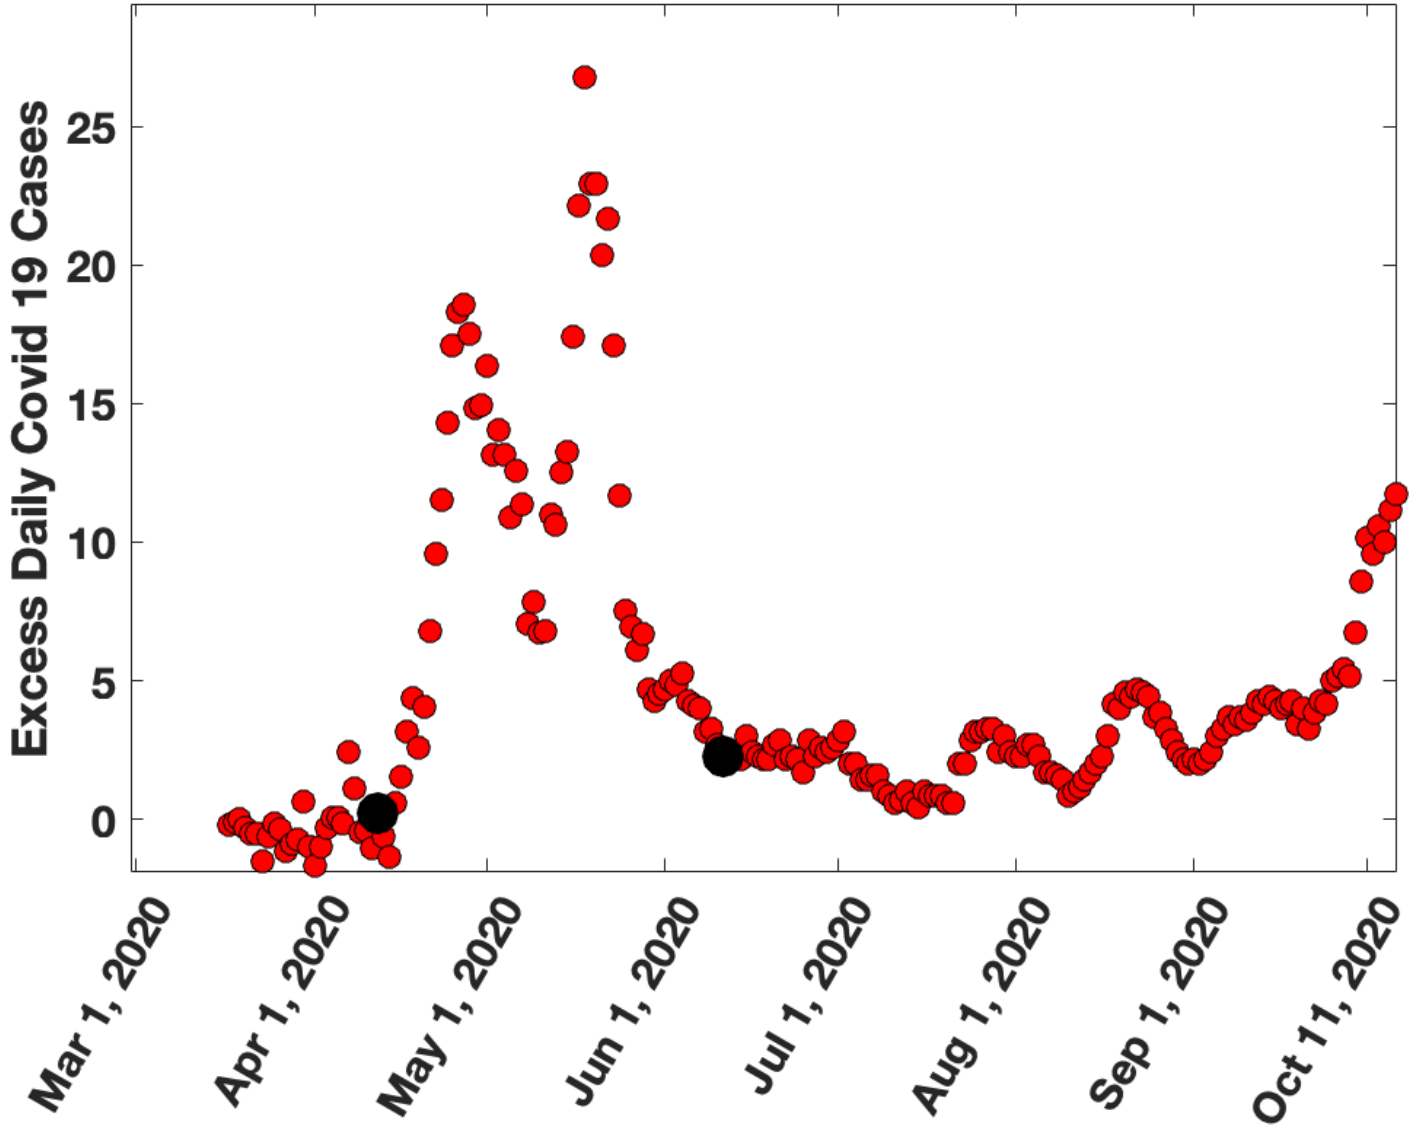

# MERCER

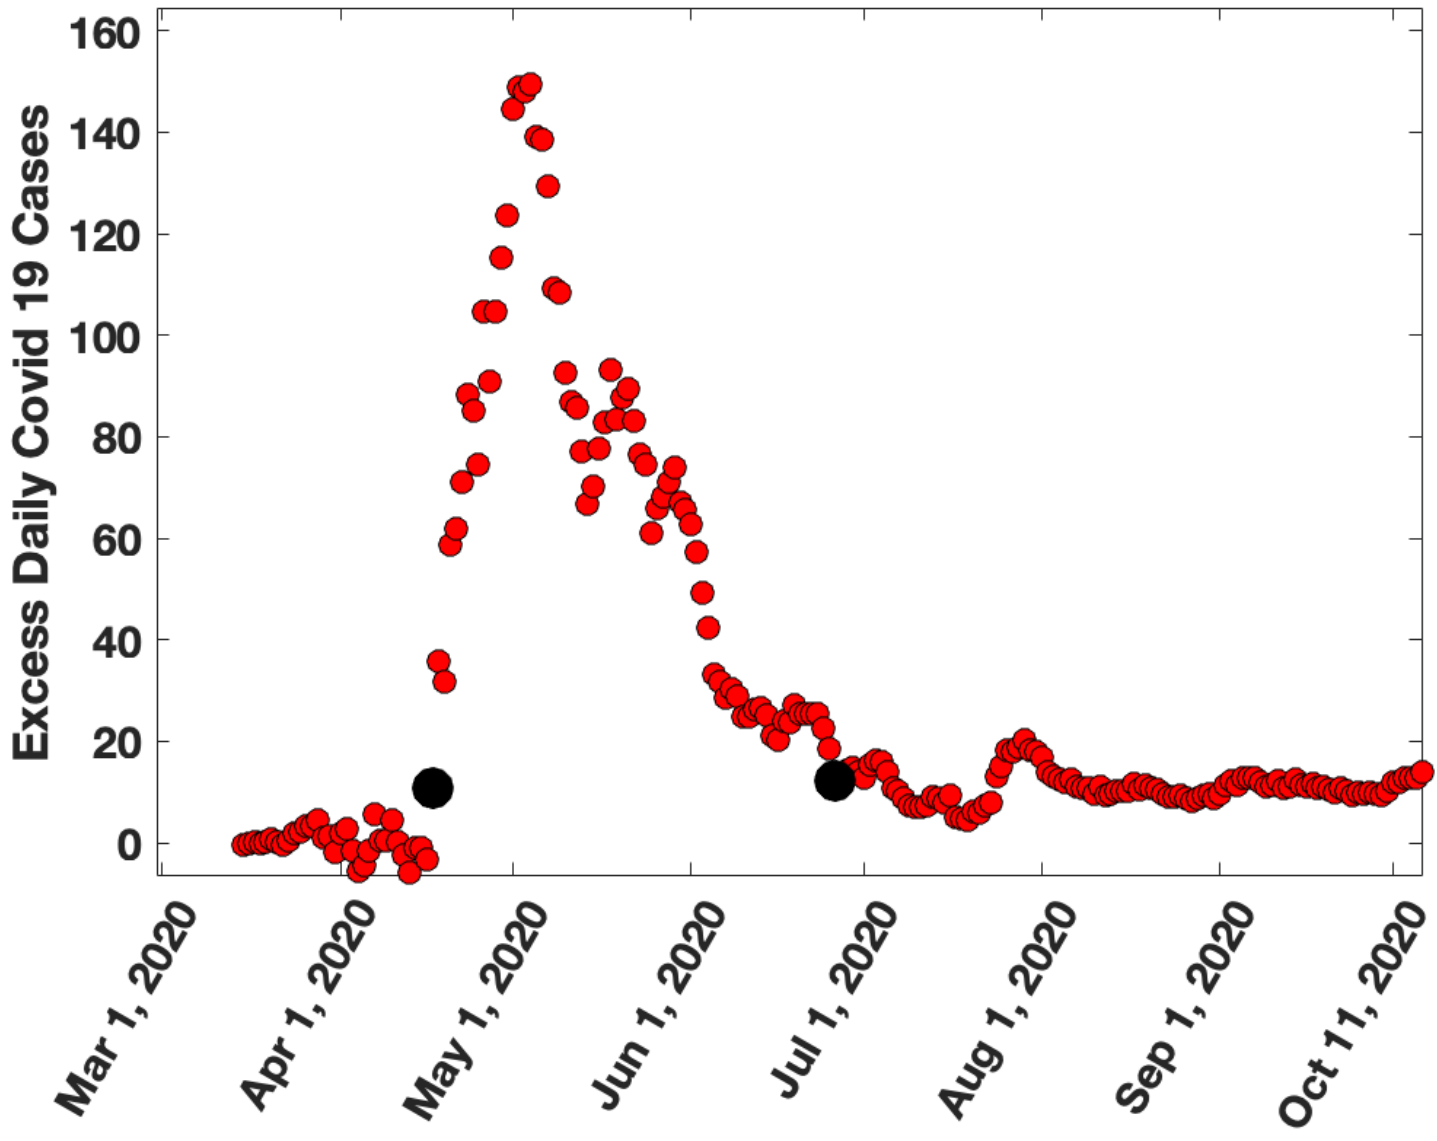

# MIDDLESEX(NJ)

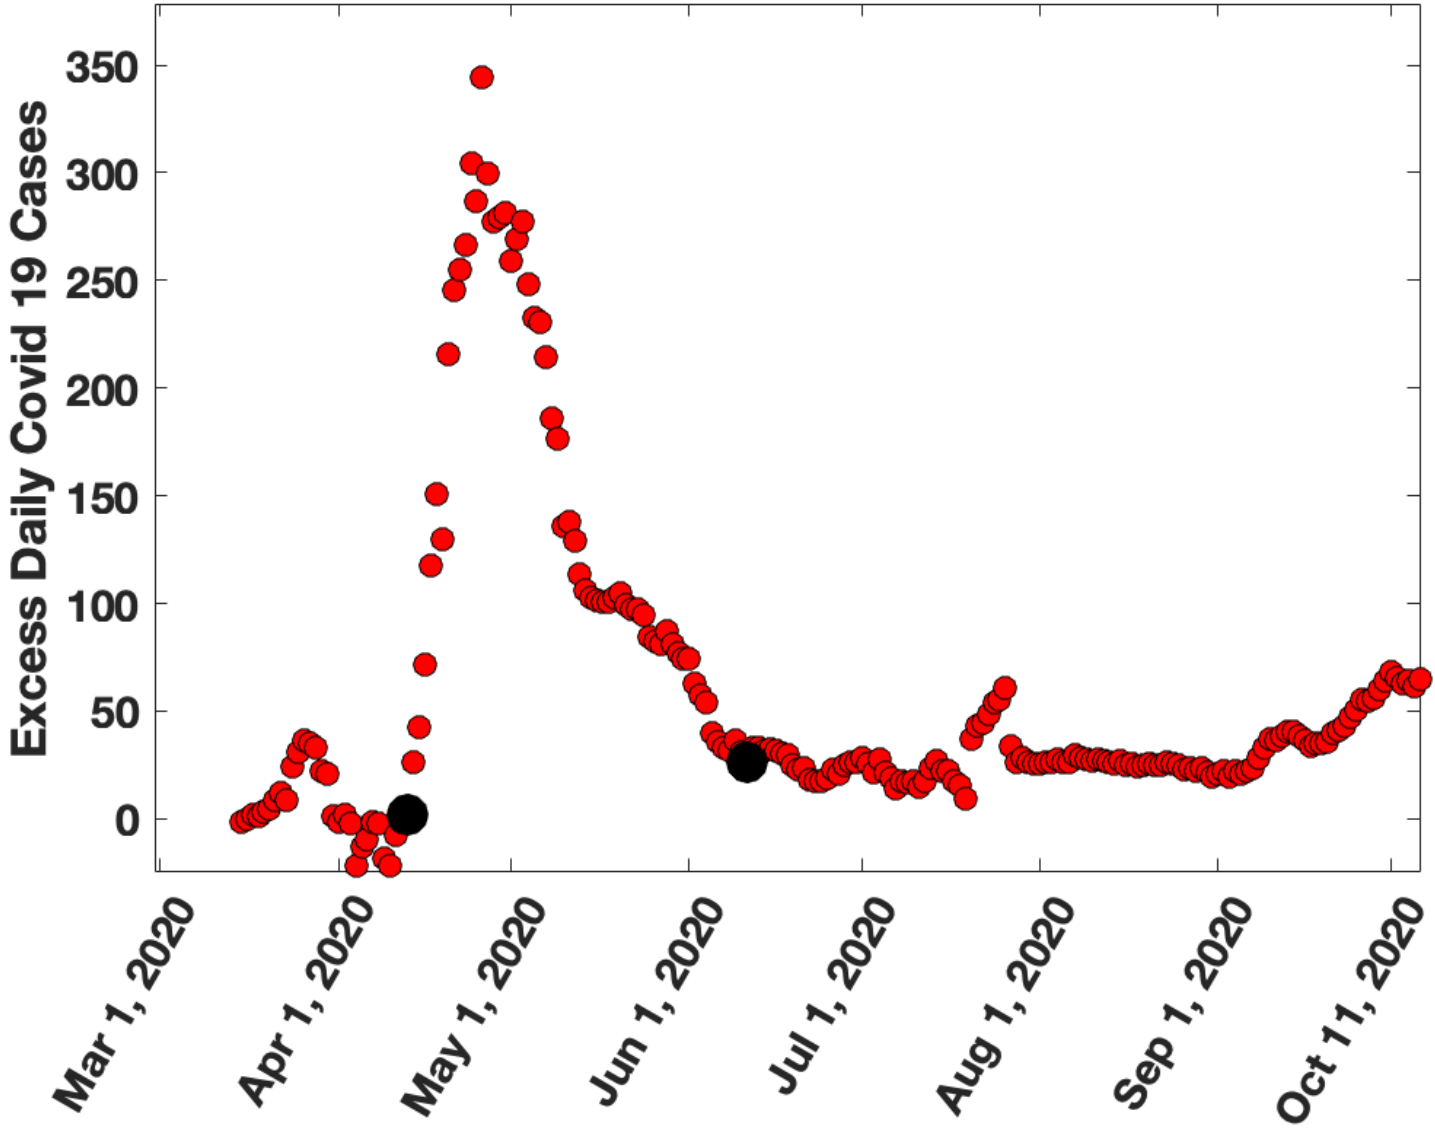

# MONMOUTH

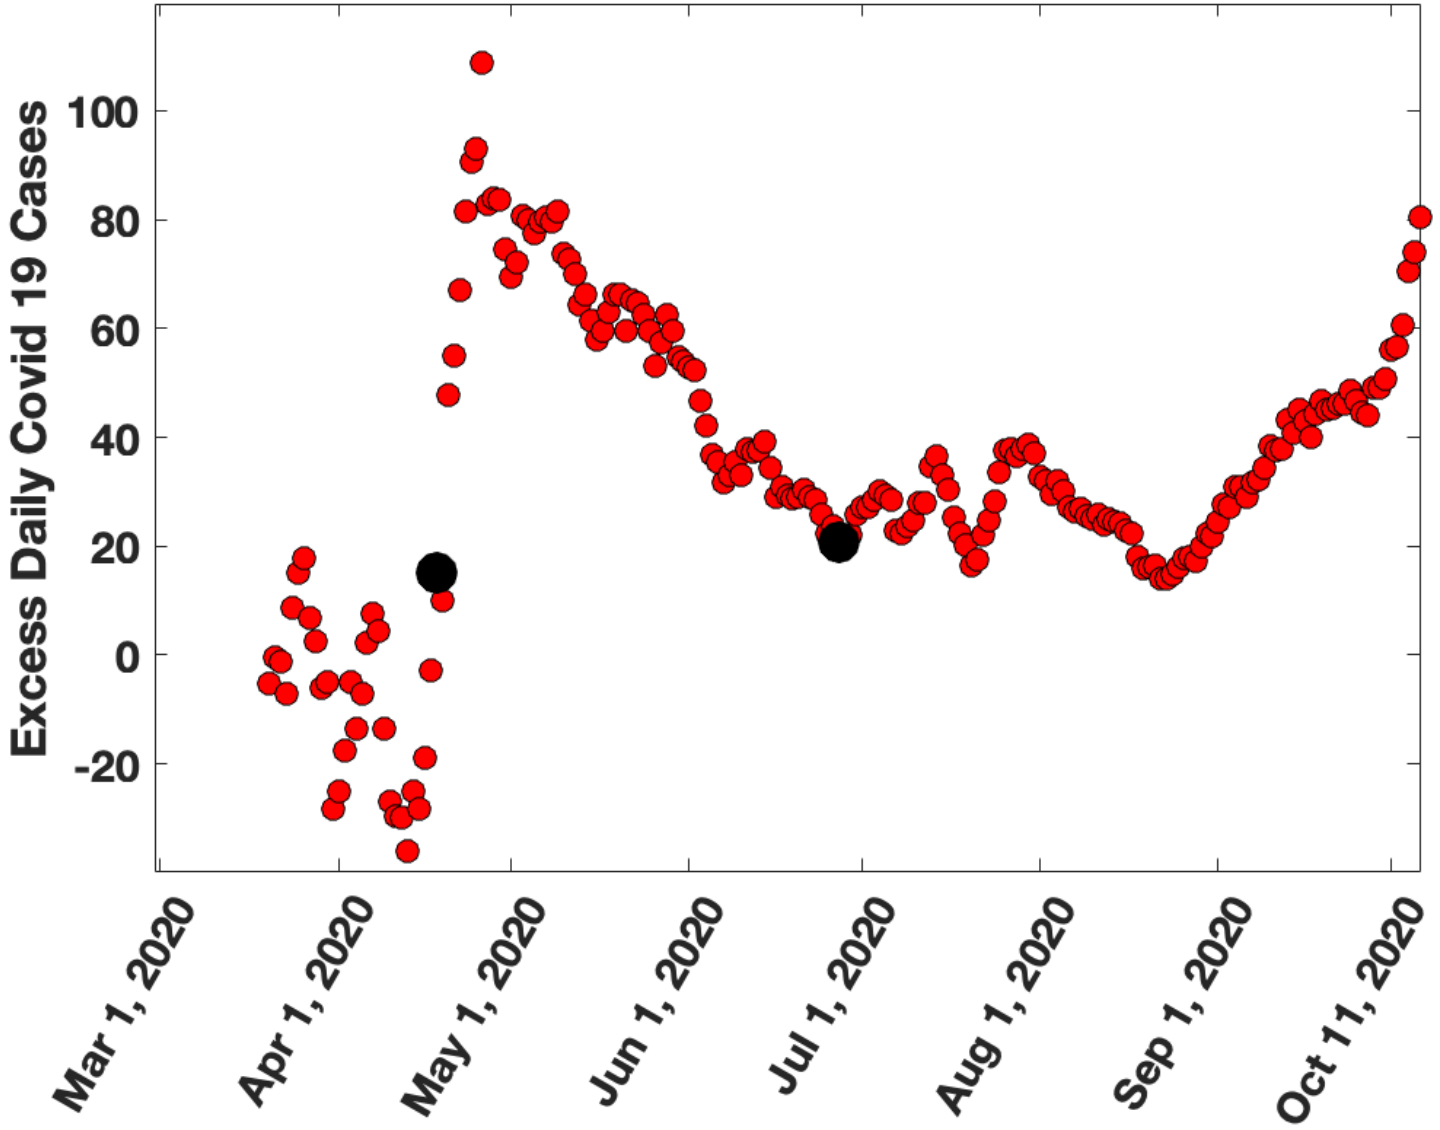

# MORRIS

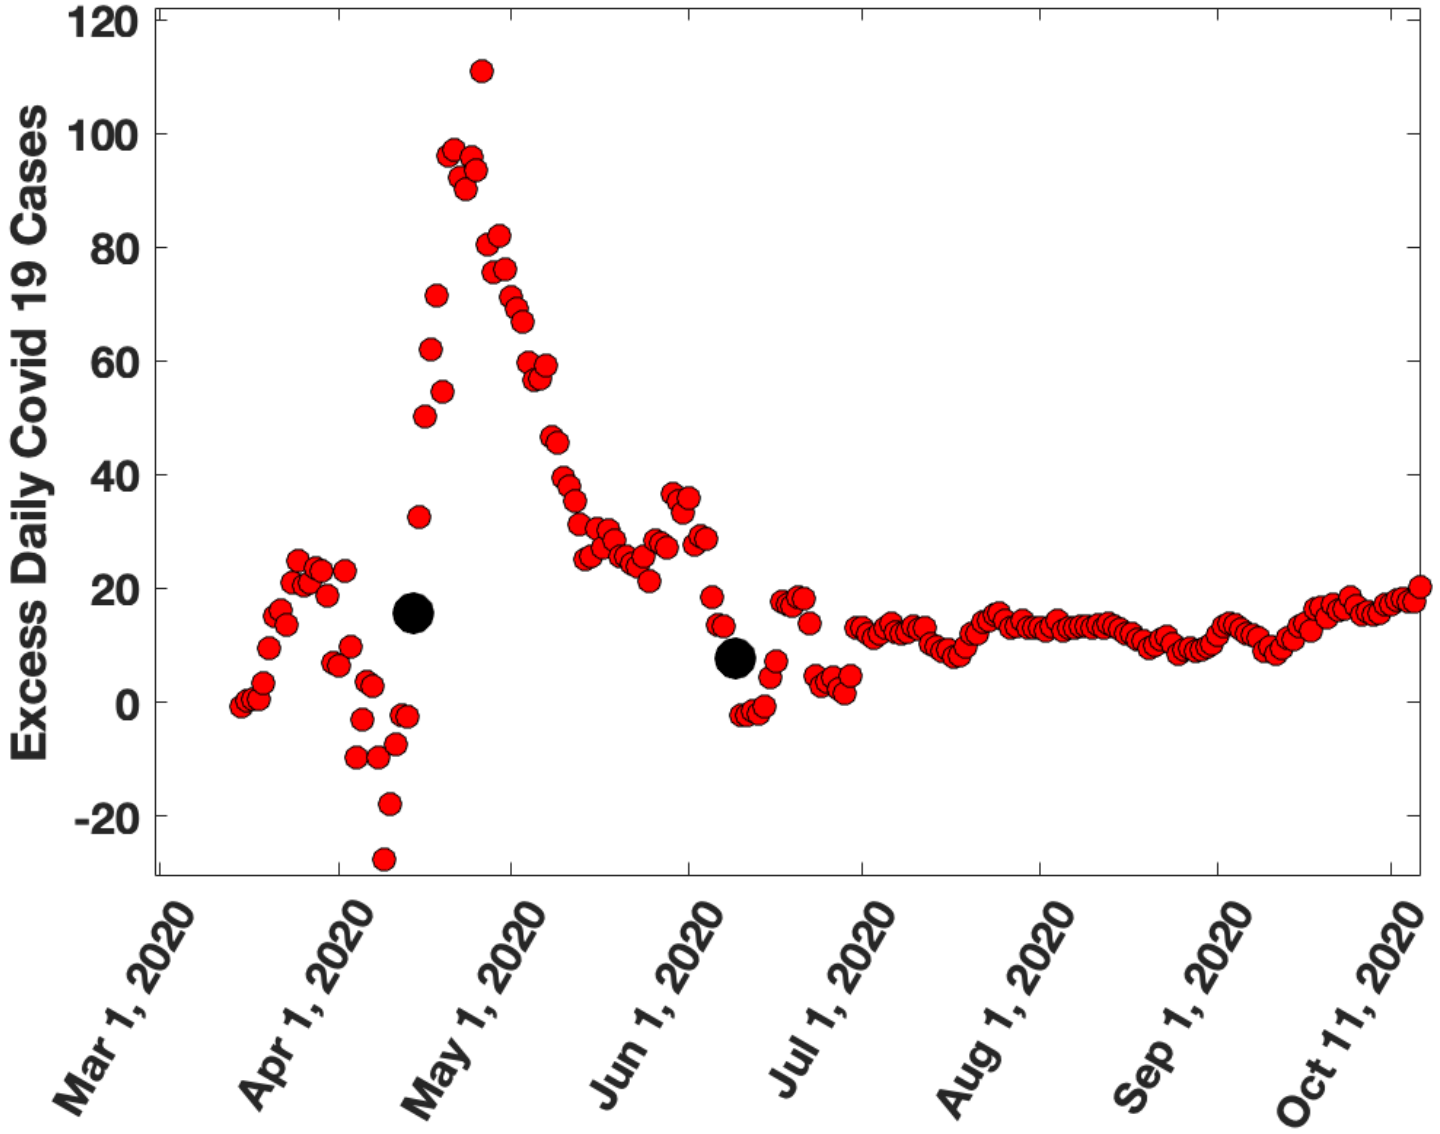

# OCEAN

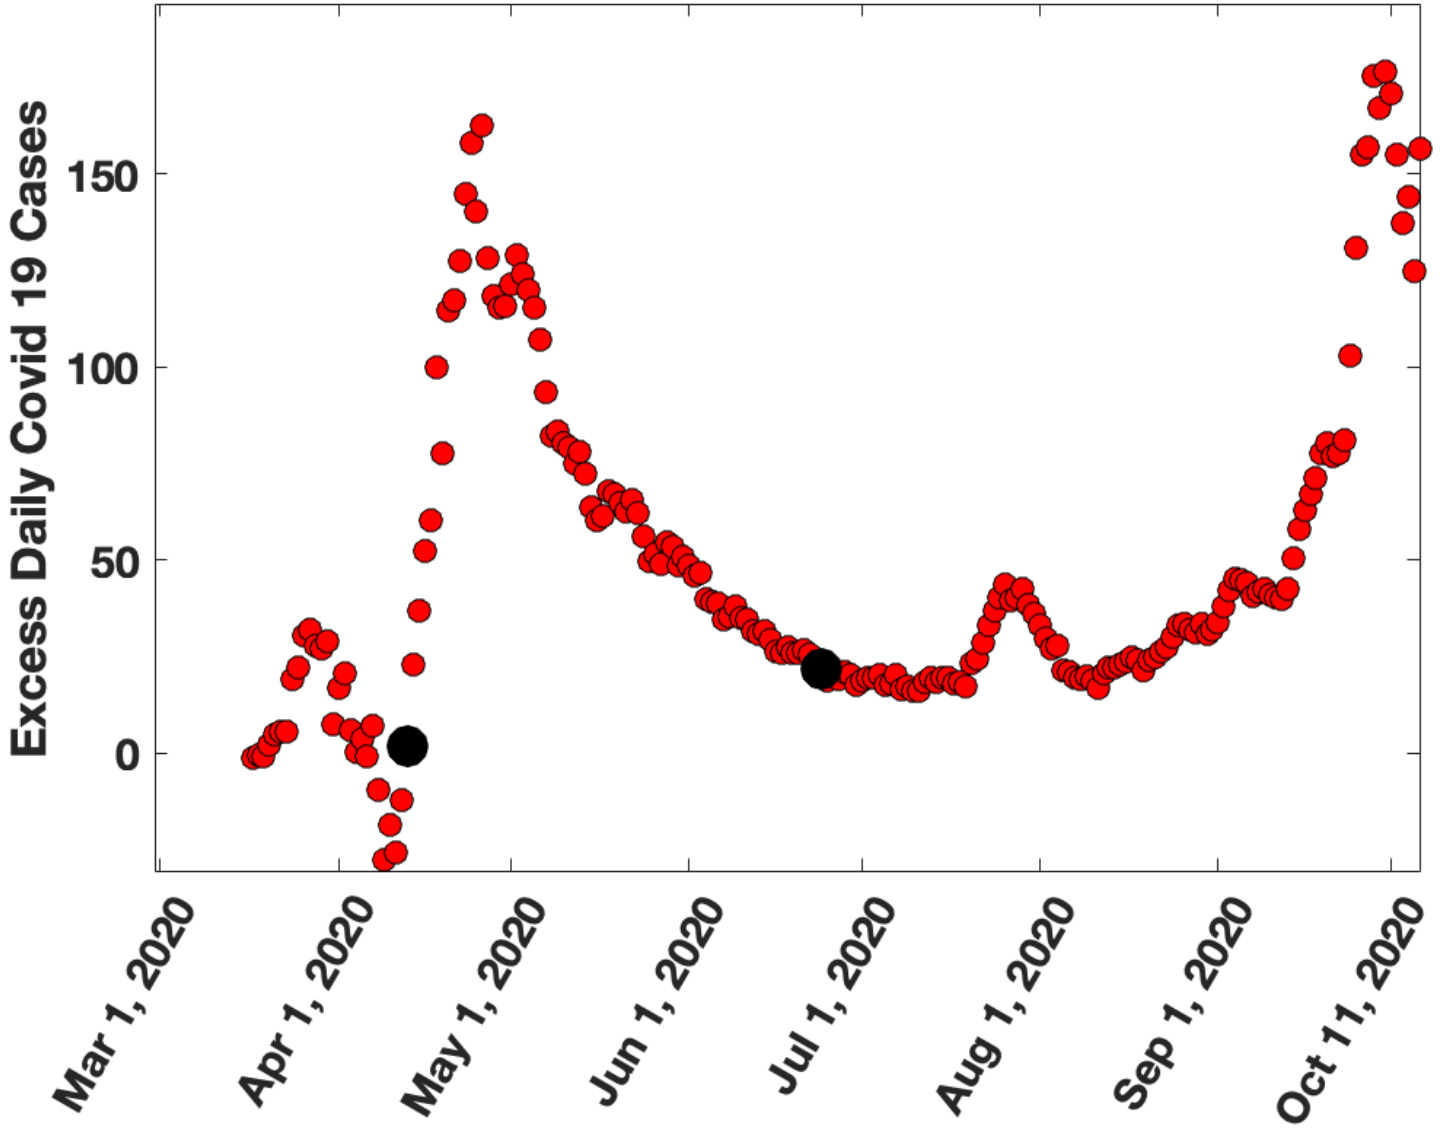

# PASSIAC

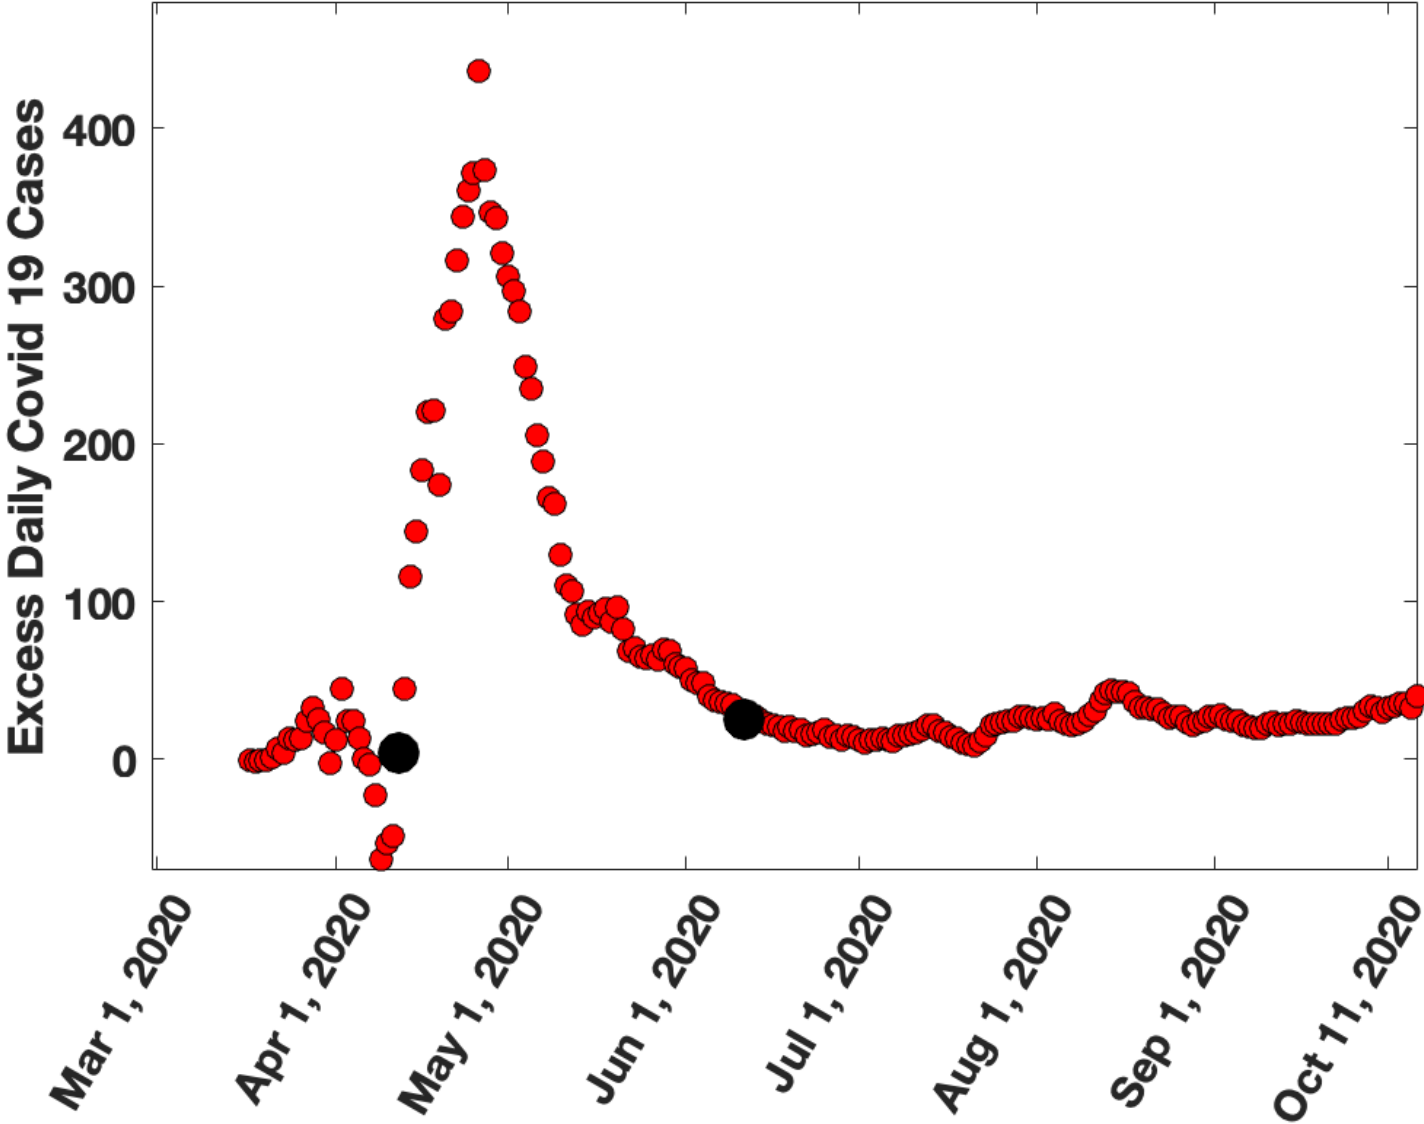



# SALEM

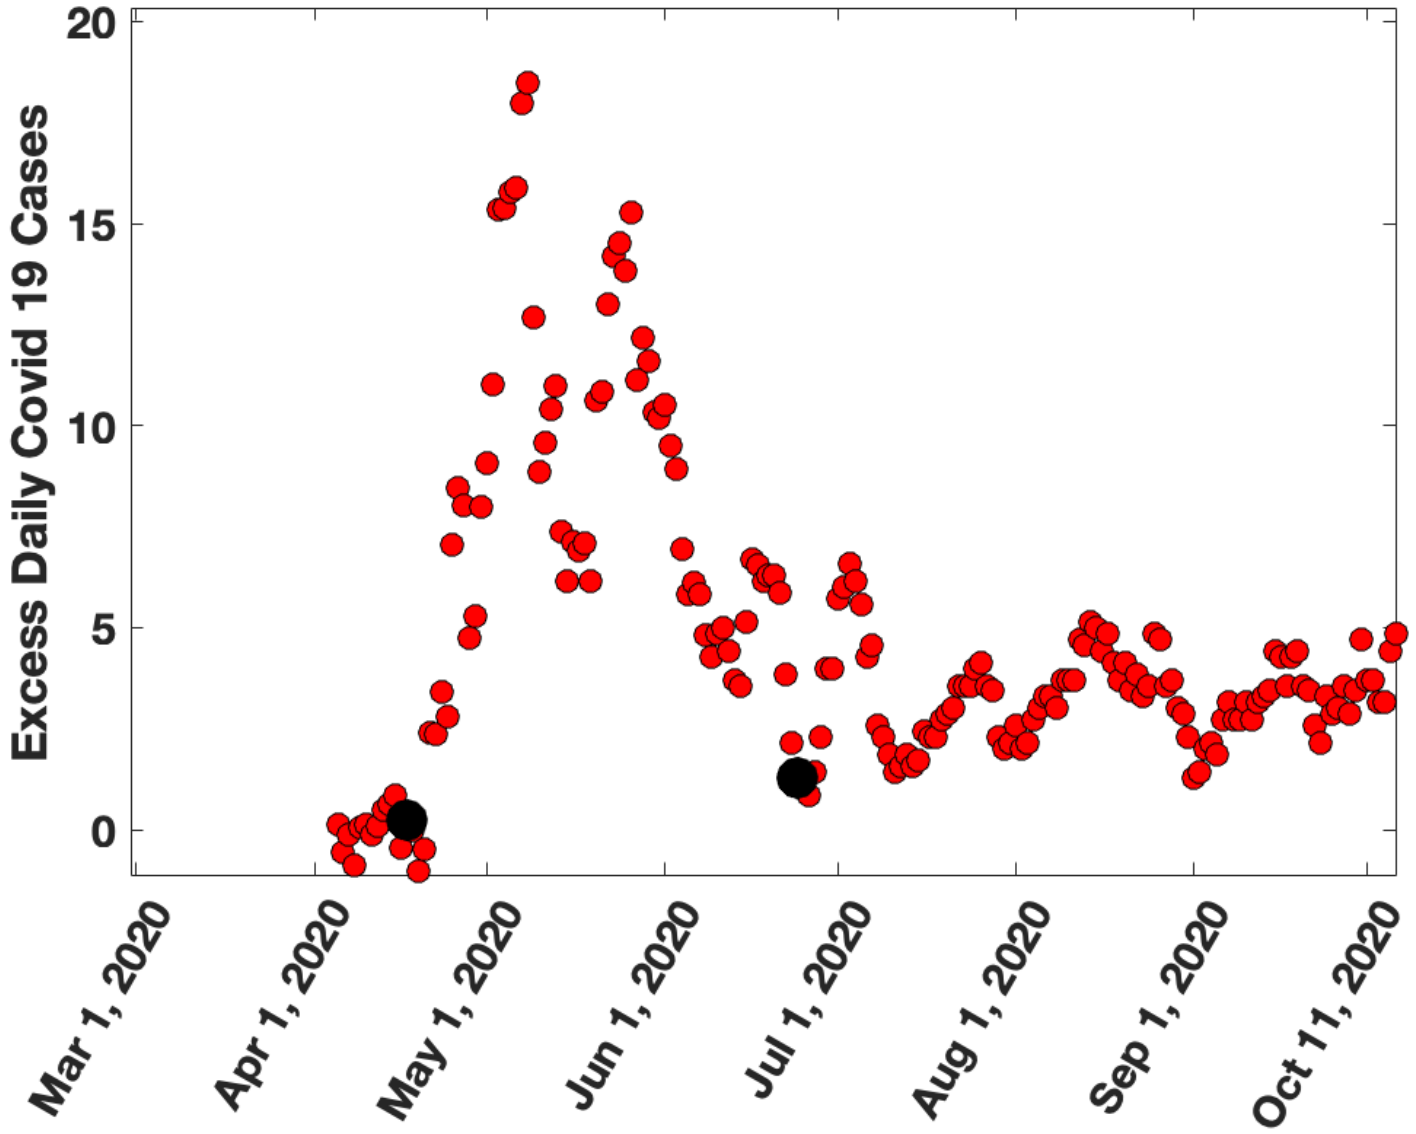

# SOMERSET

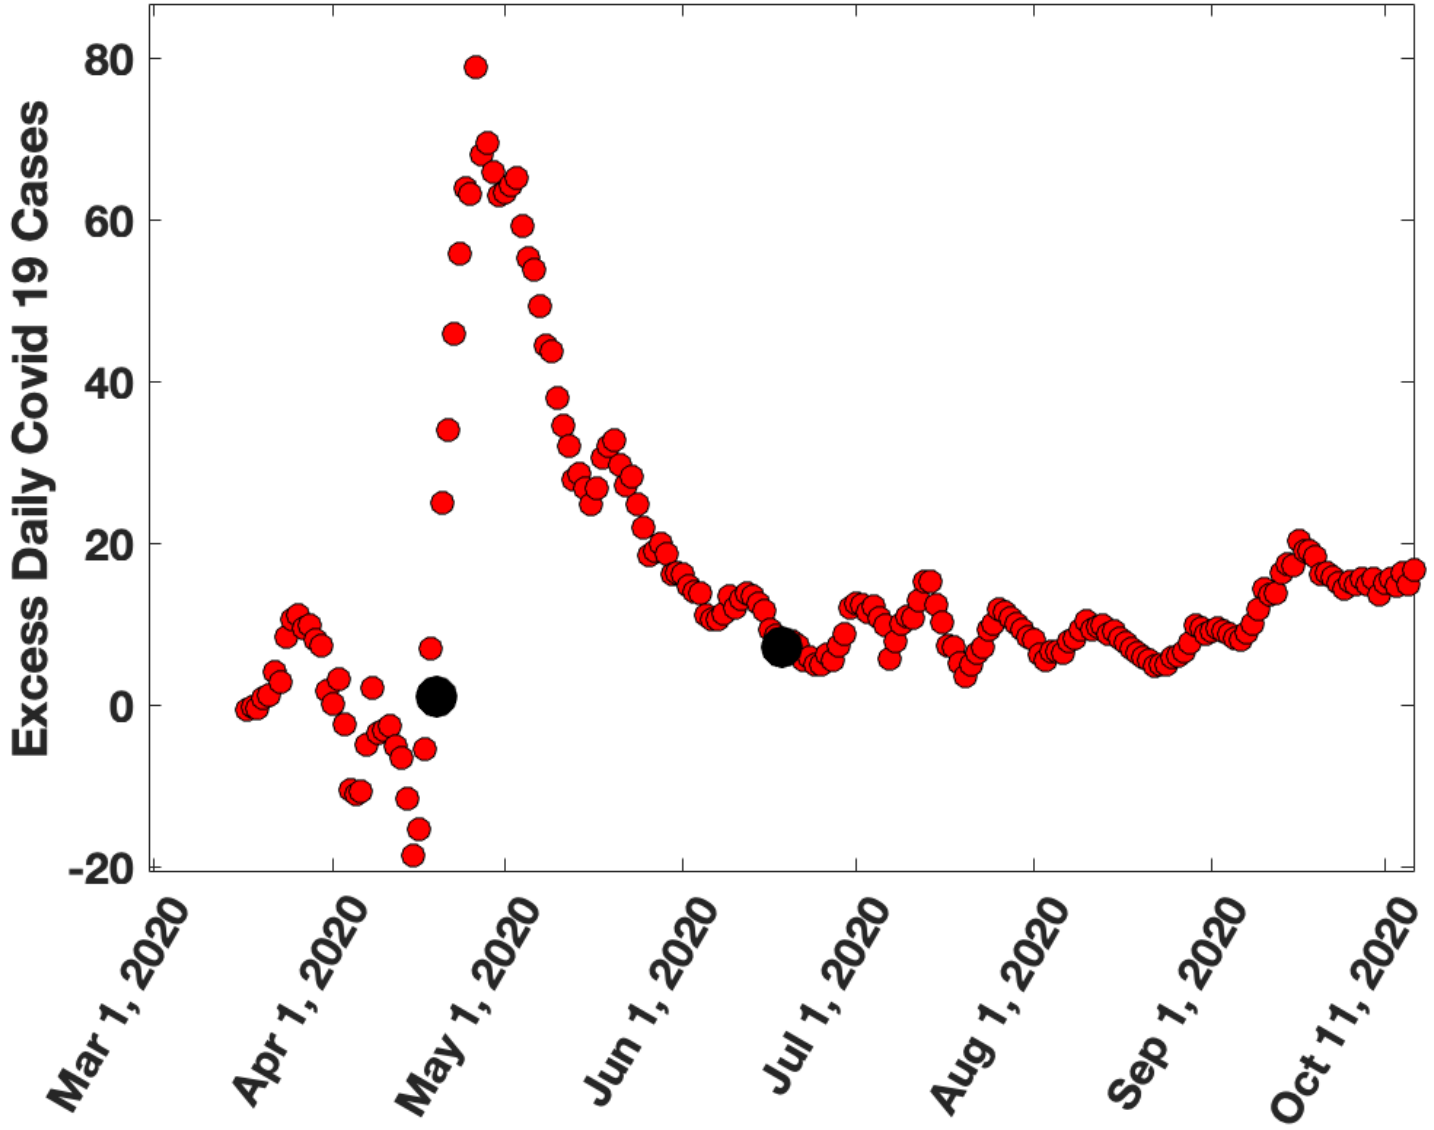

# SUSSEX

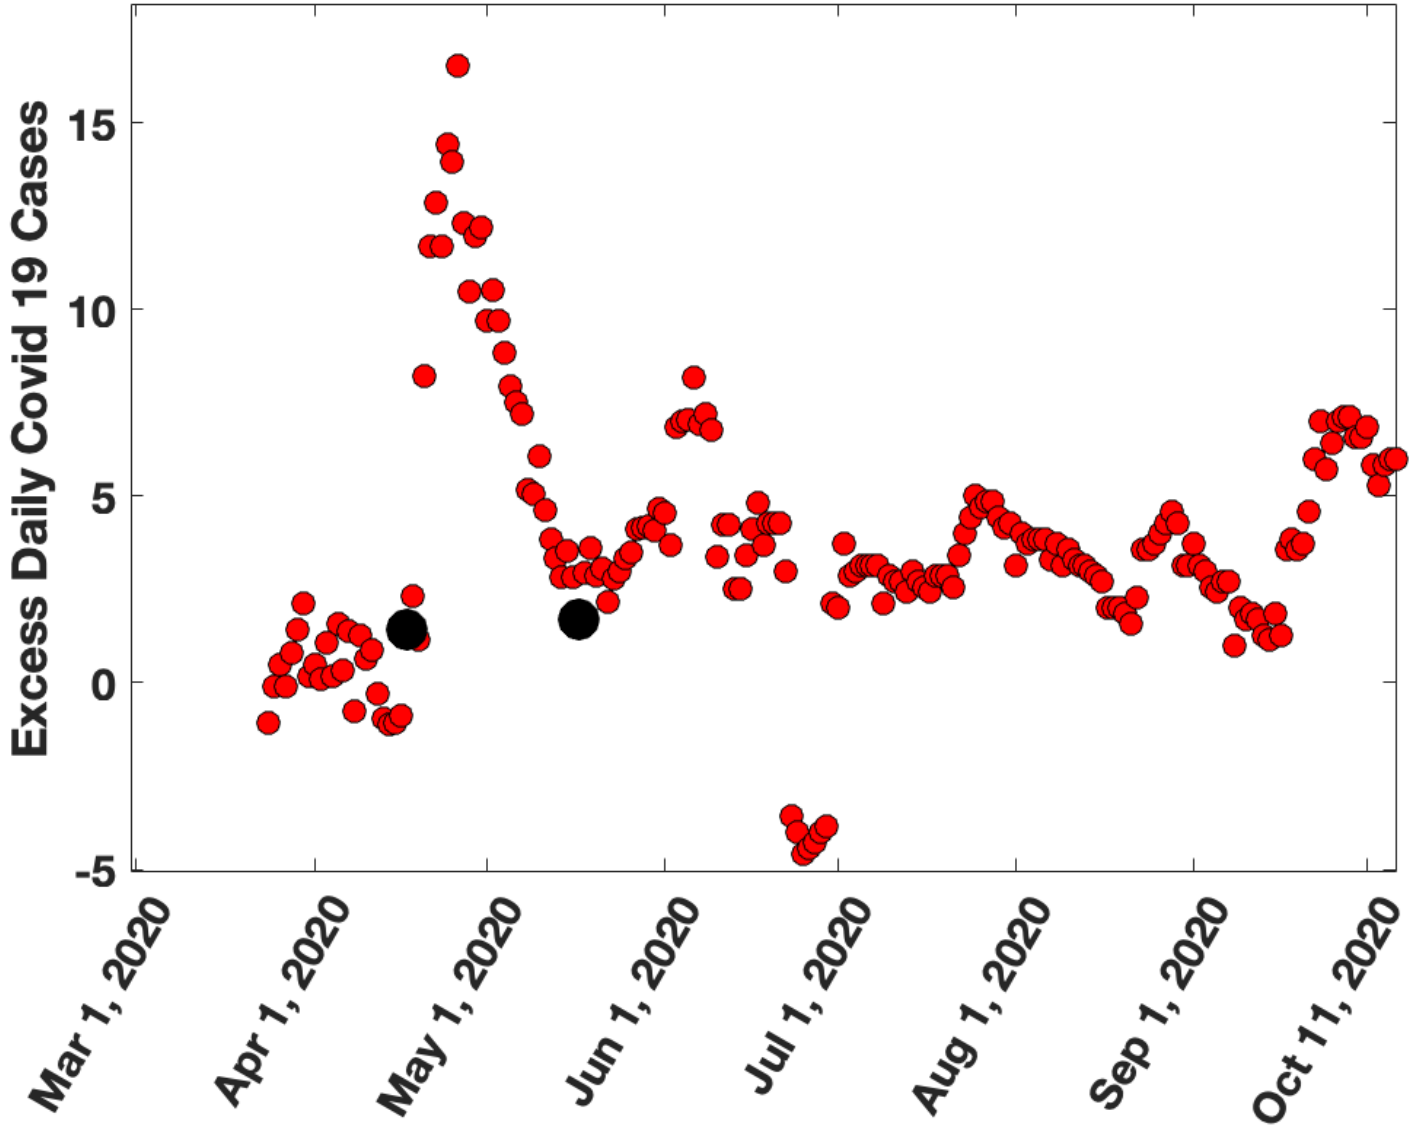

# UNION

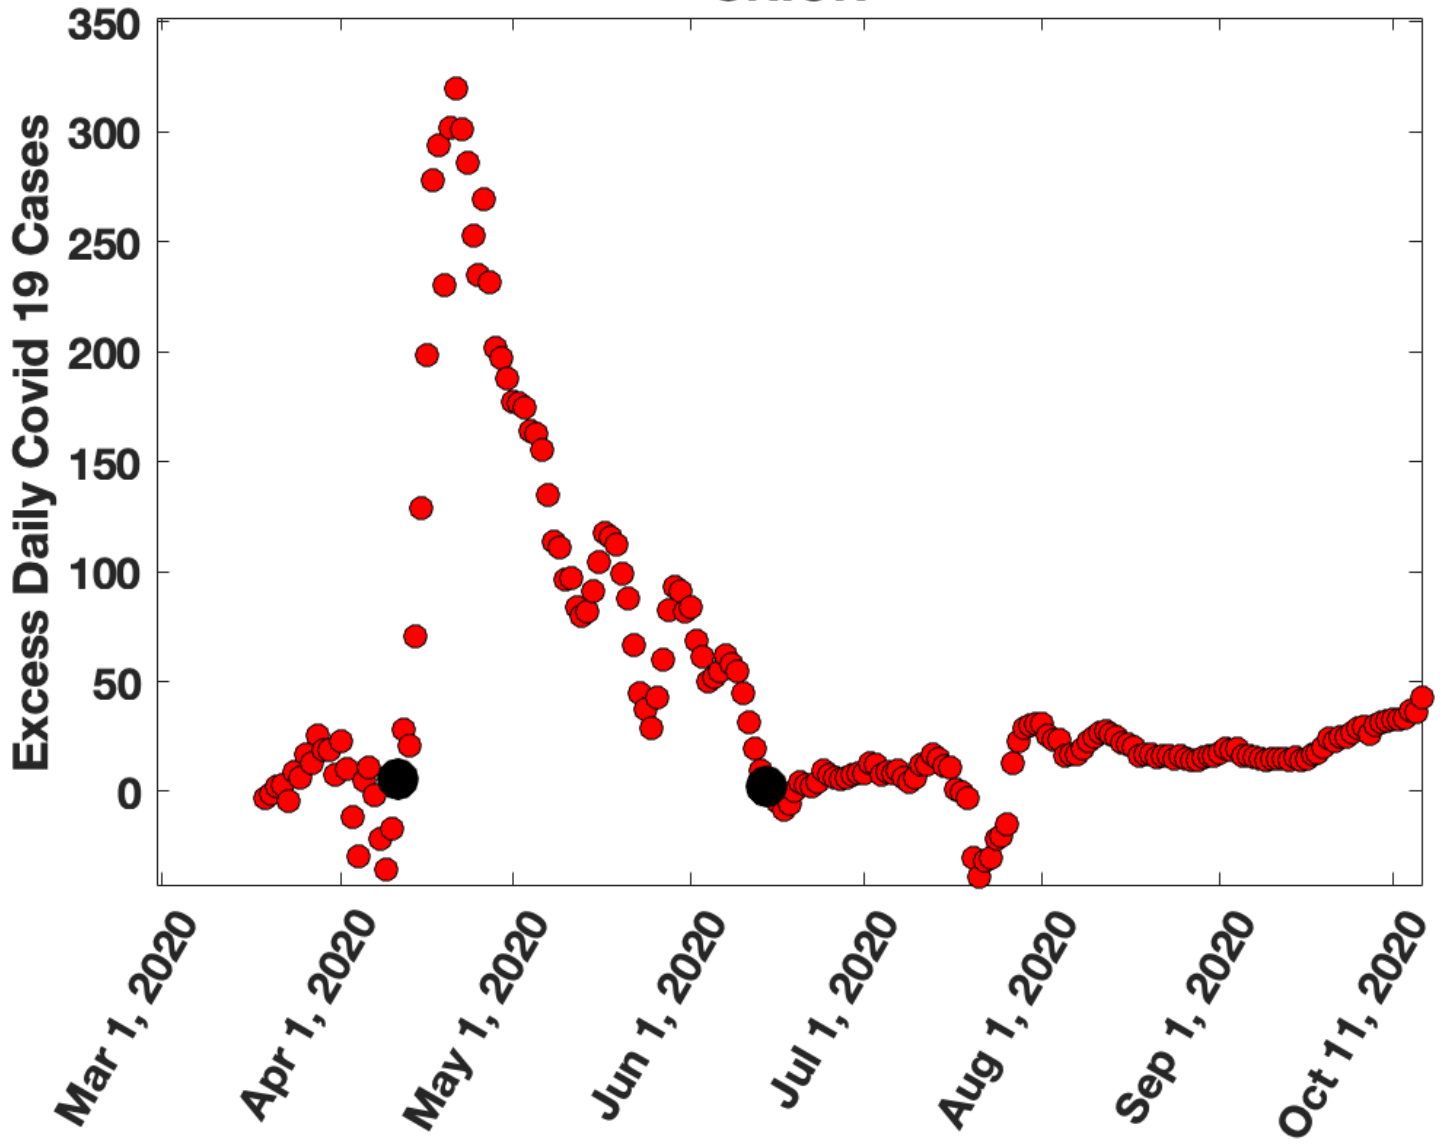

# WARREN

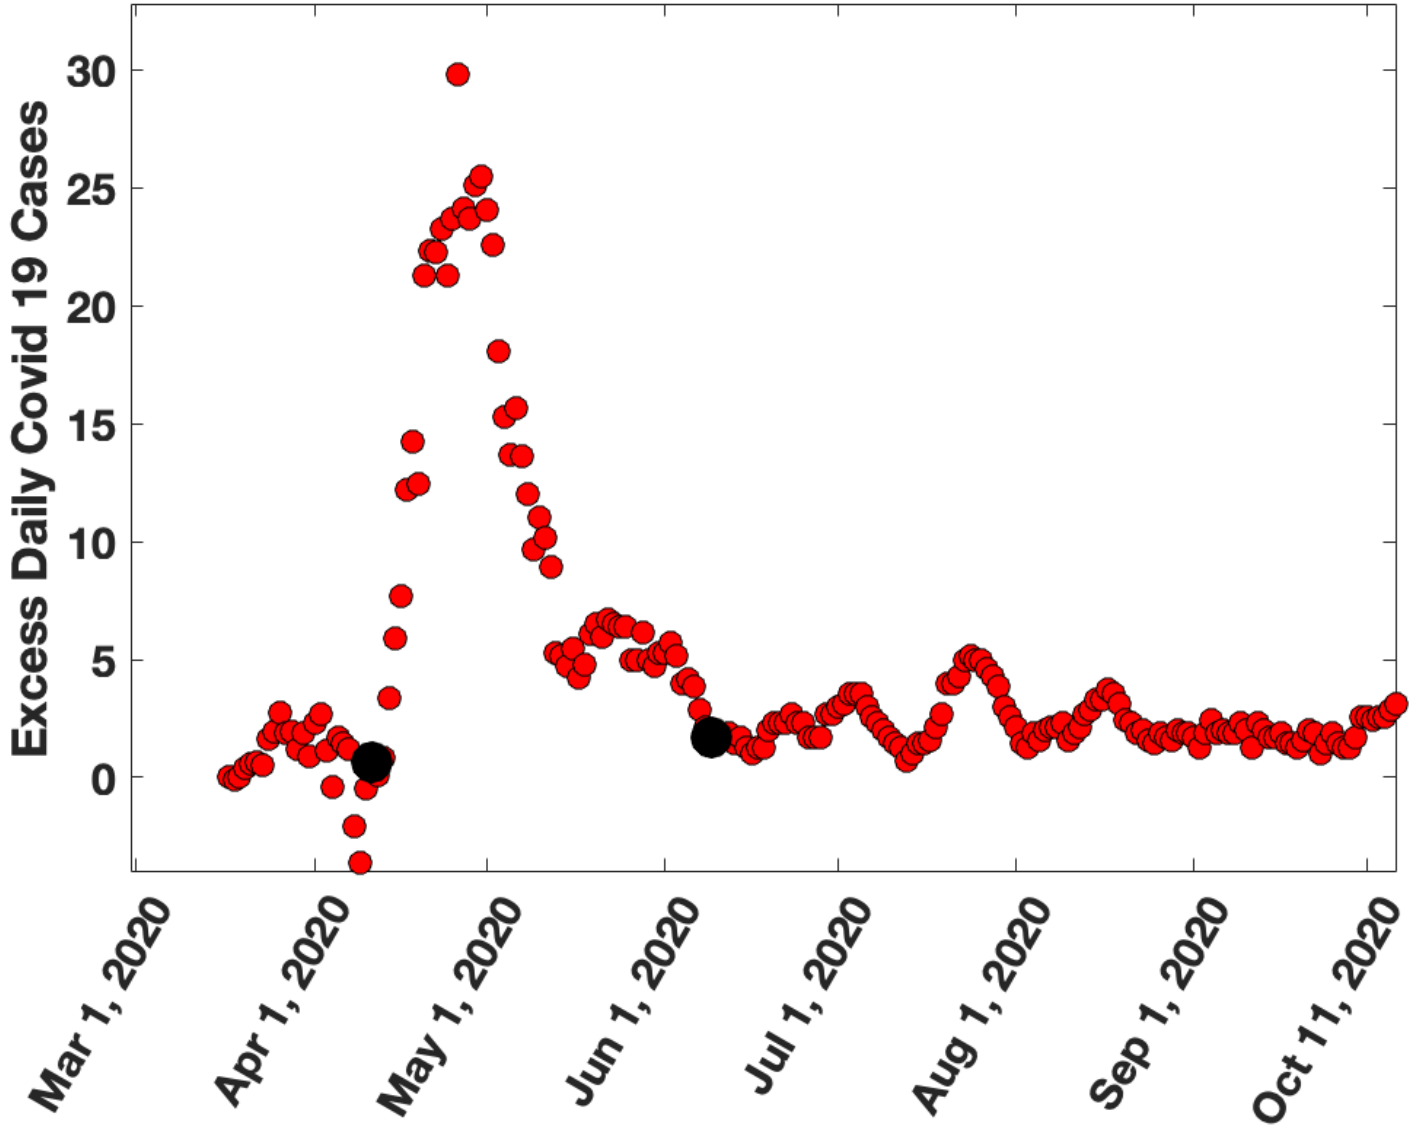

Supplement: Supplementary file [file media-8.pdf]
