# Supplementary material for: Migration of households from New York City and the Second Peak in Covid-19 cases in New Jersey, Connecticut and New York Counties
Source: bioRxiv or medRxiv preprint supplement (doi:10.1101/2021.03.29.21254583), 2021-03-31

# NASSAU

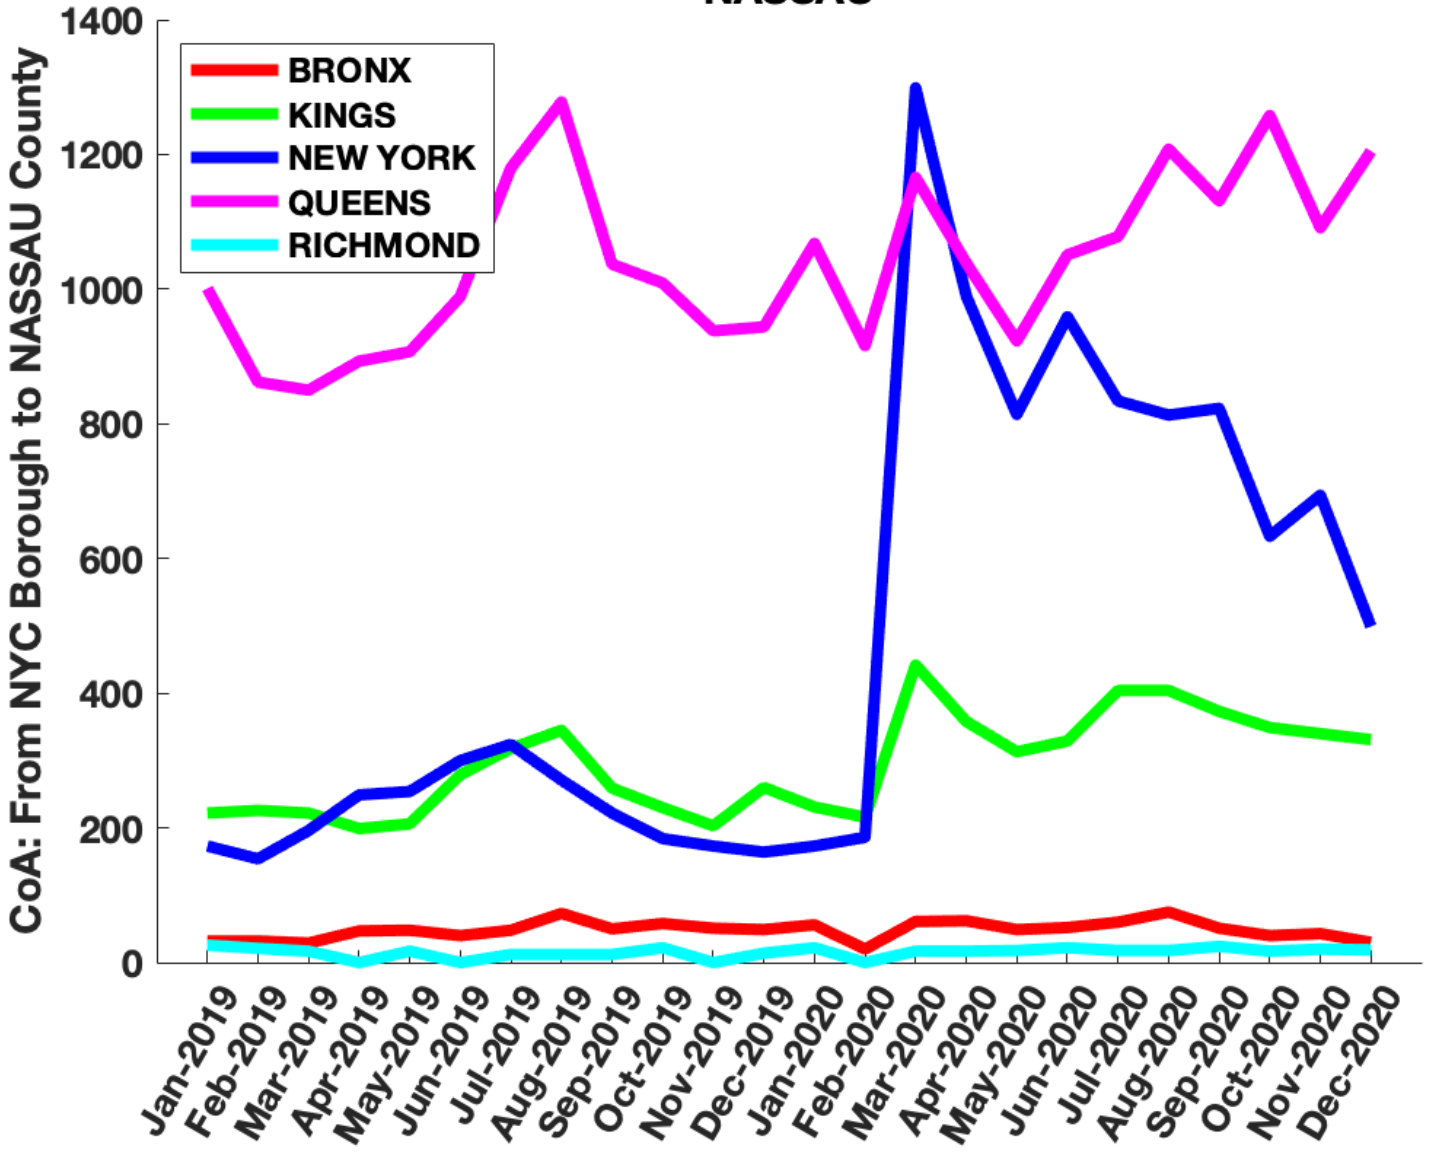

# SUFFOLK

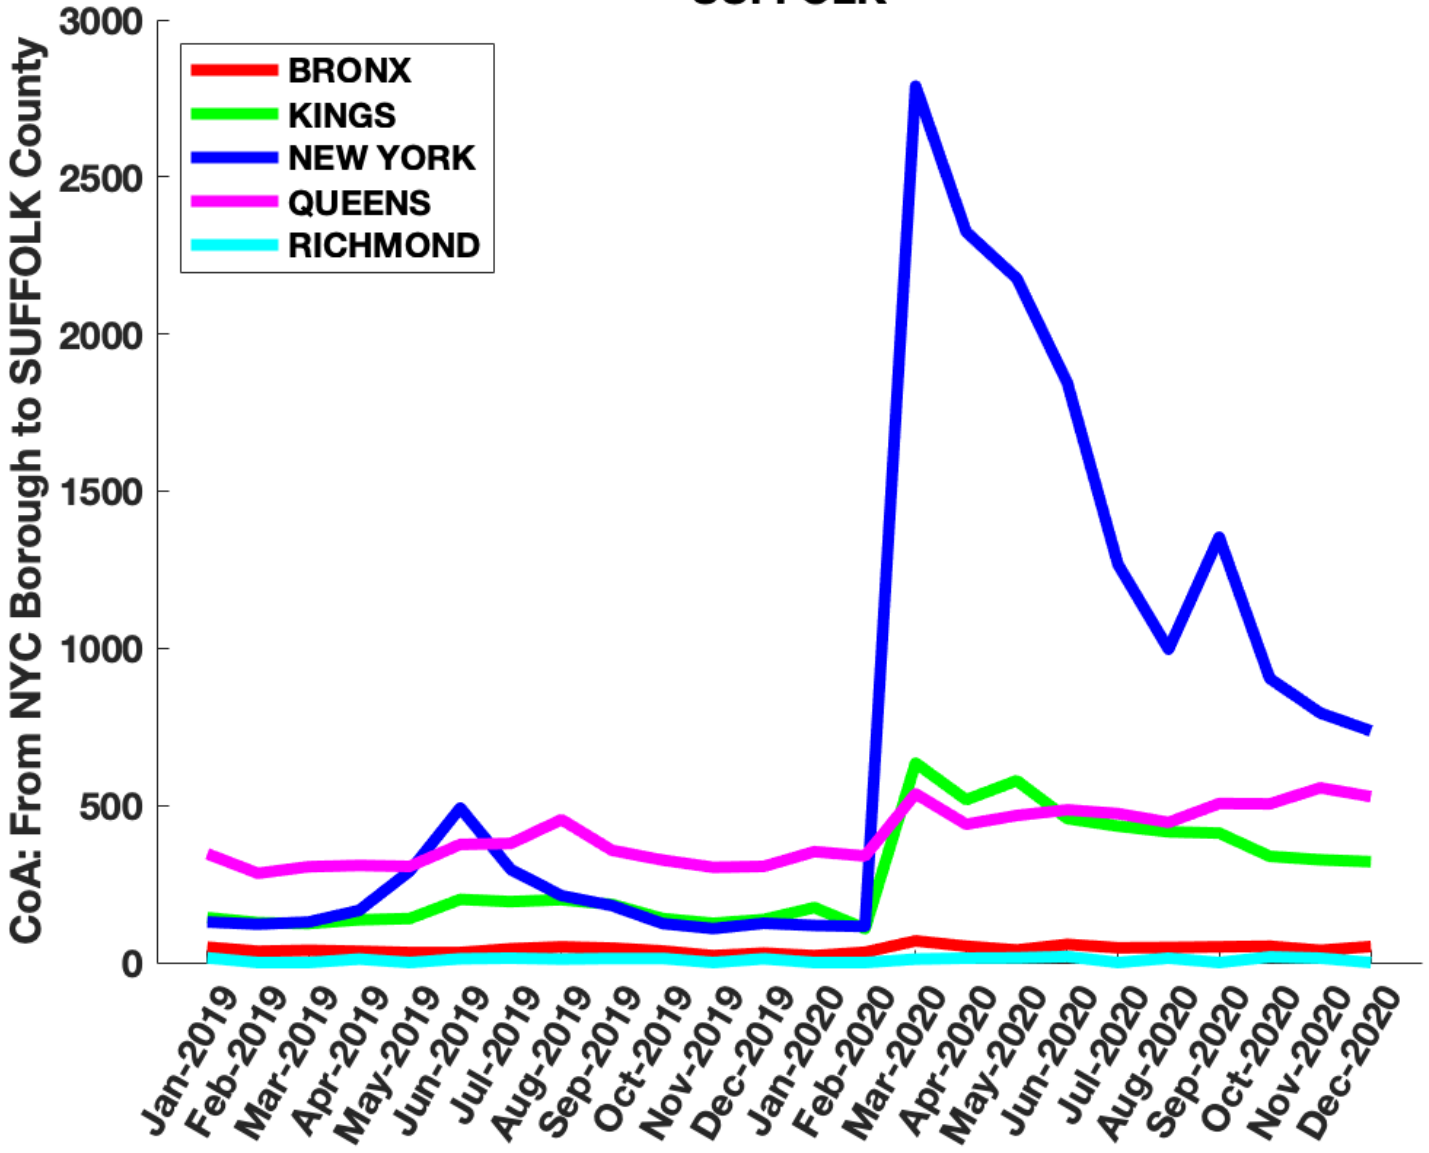

CoA: From NYC Borough to WESTCHESTER County

### WESTCHESTER

- BRONX
- KINGS
- NEW YORK
- QUEENS
- RICHMOND

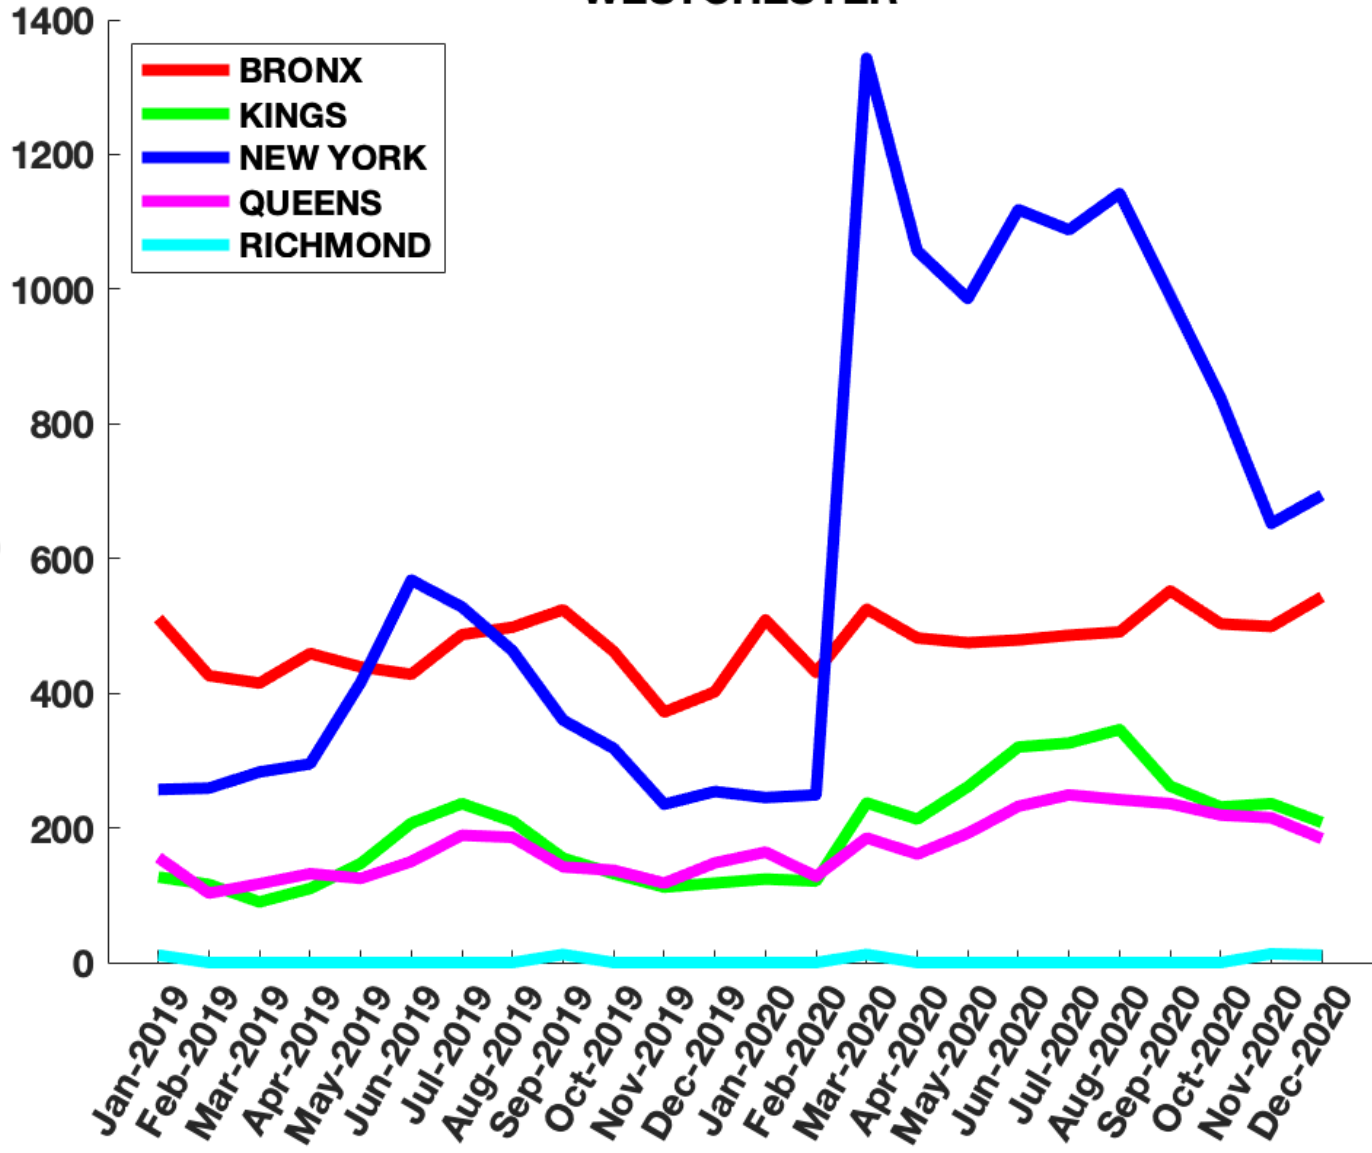

# ROCKLAND

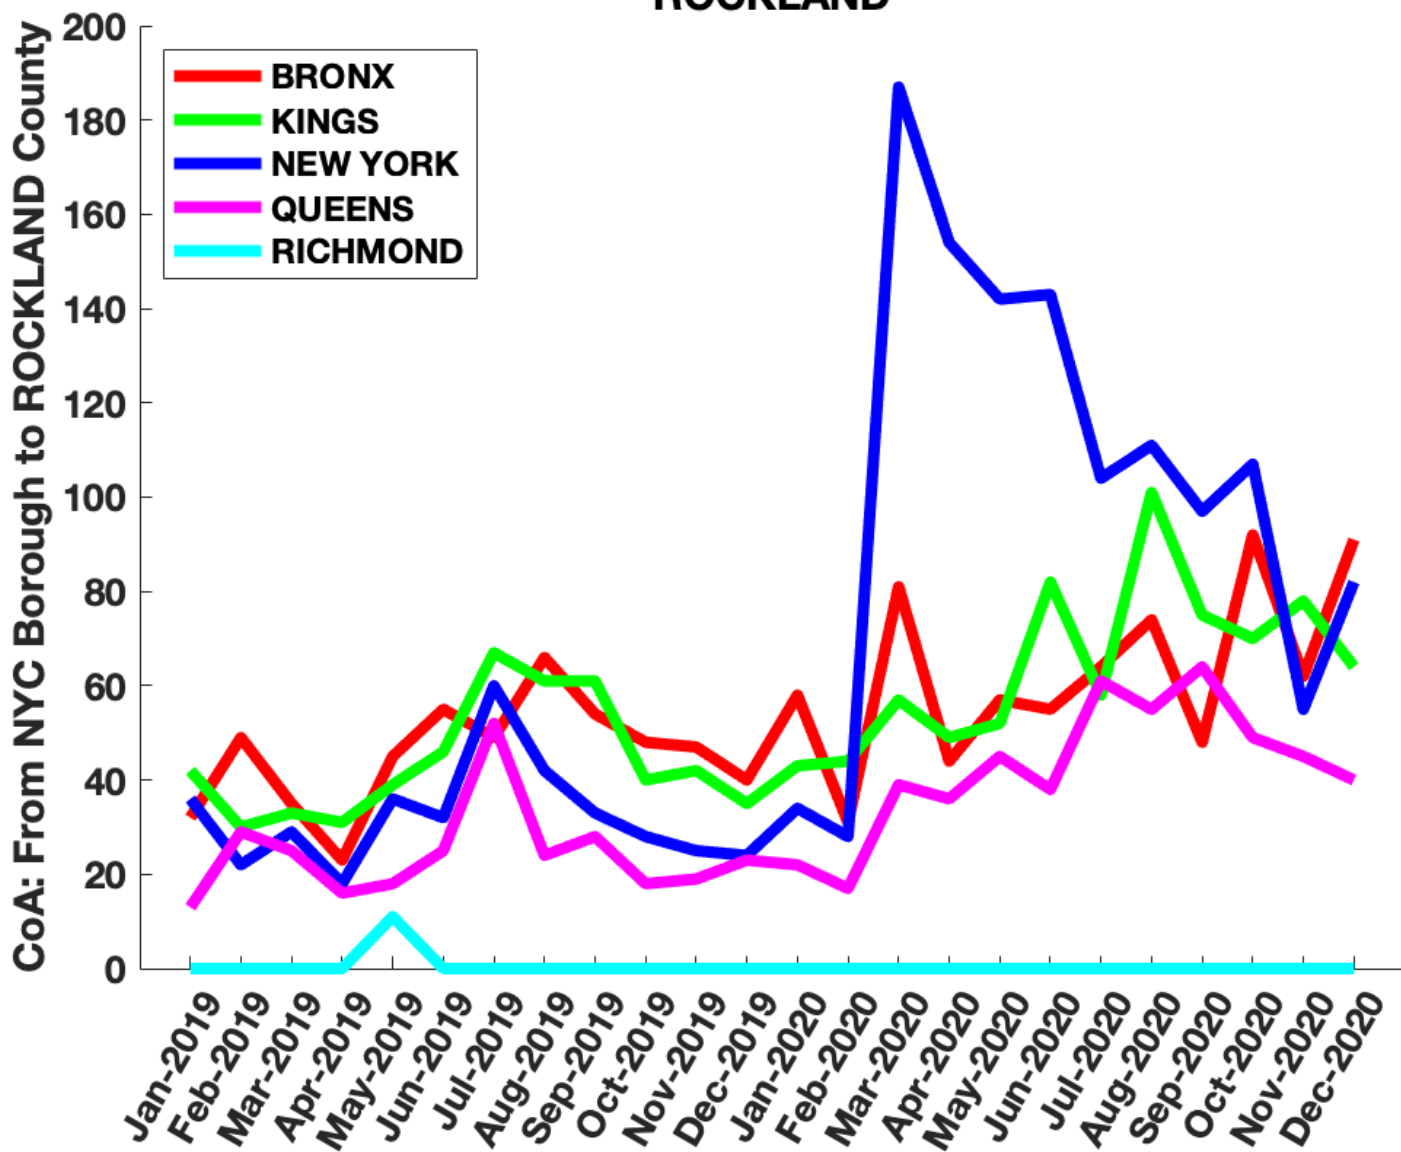

# PUTNAM

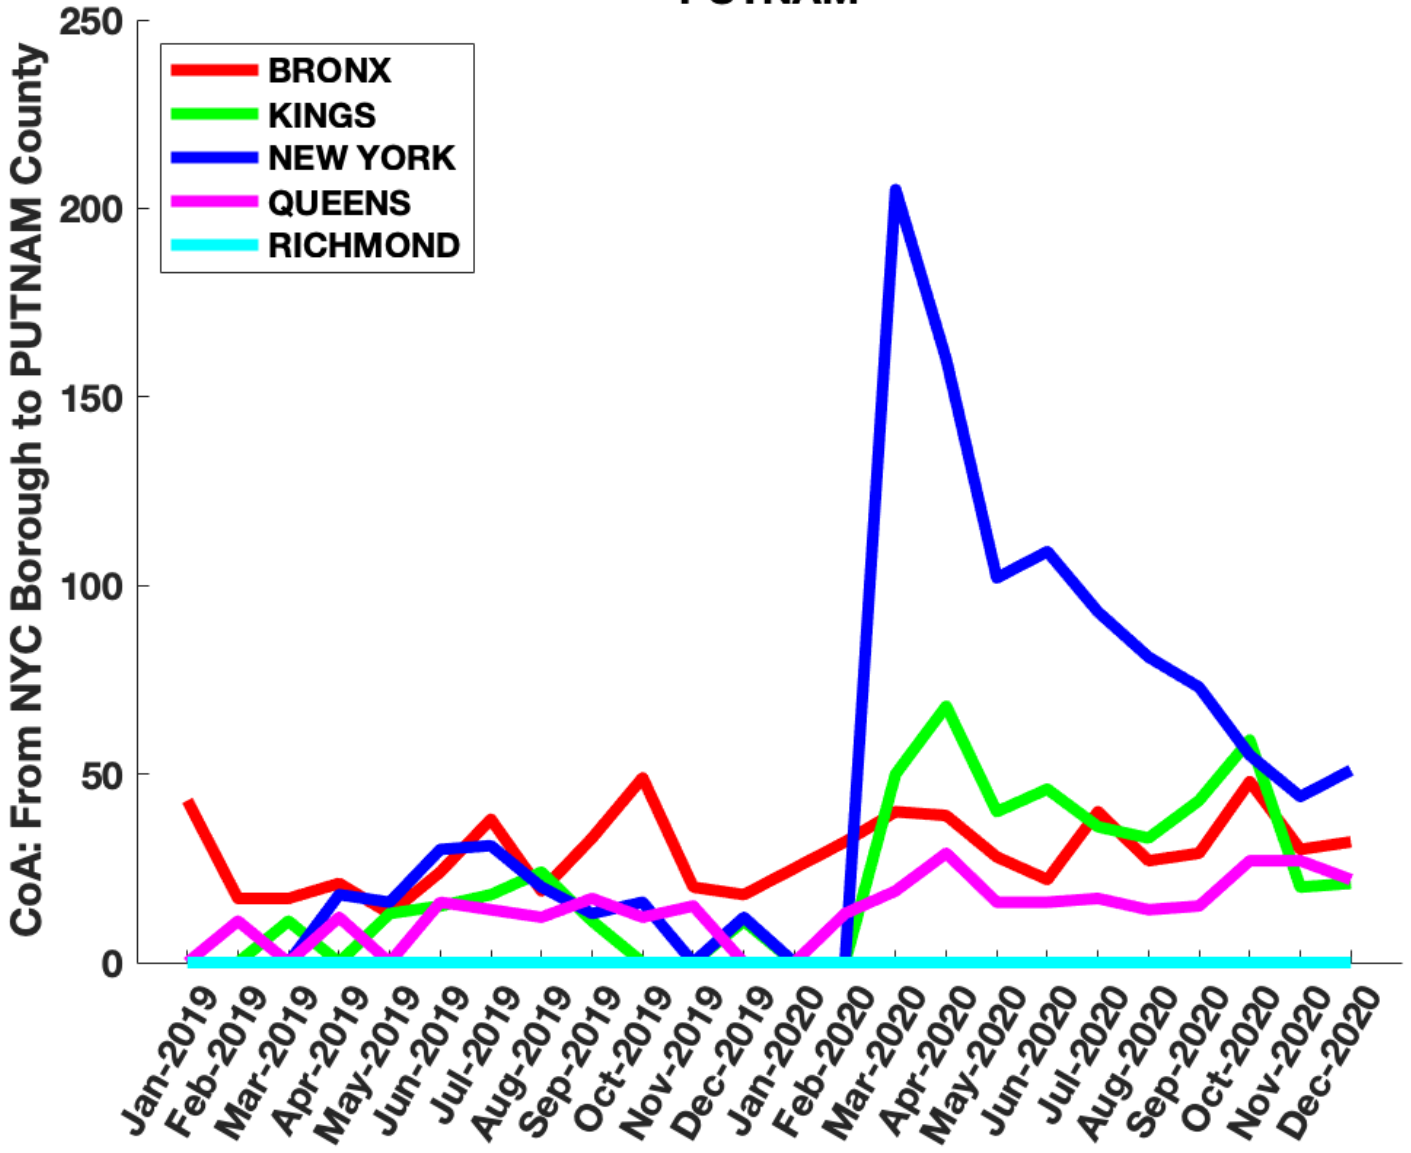

# ORANGE

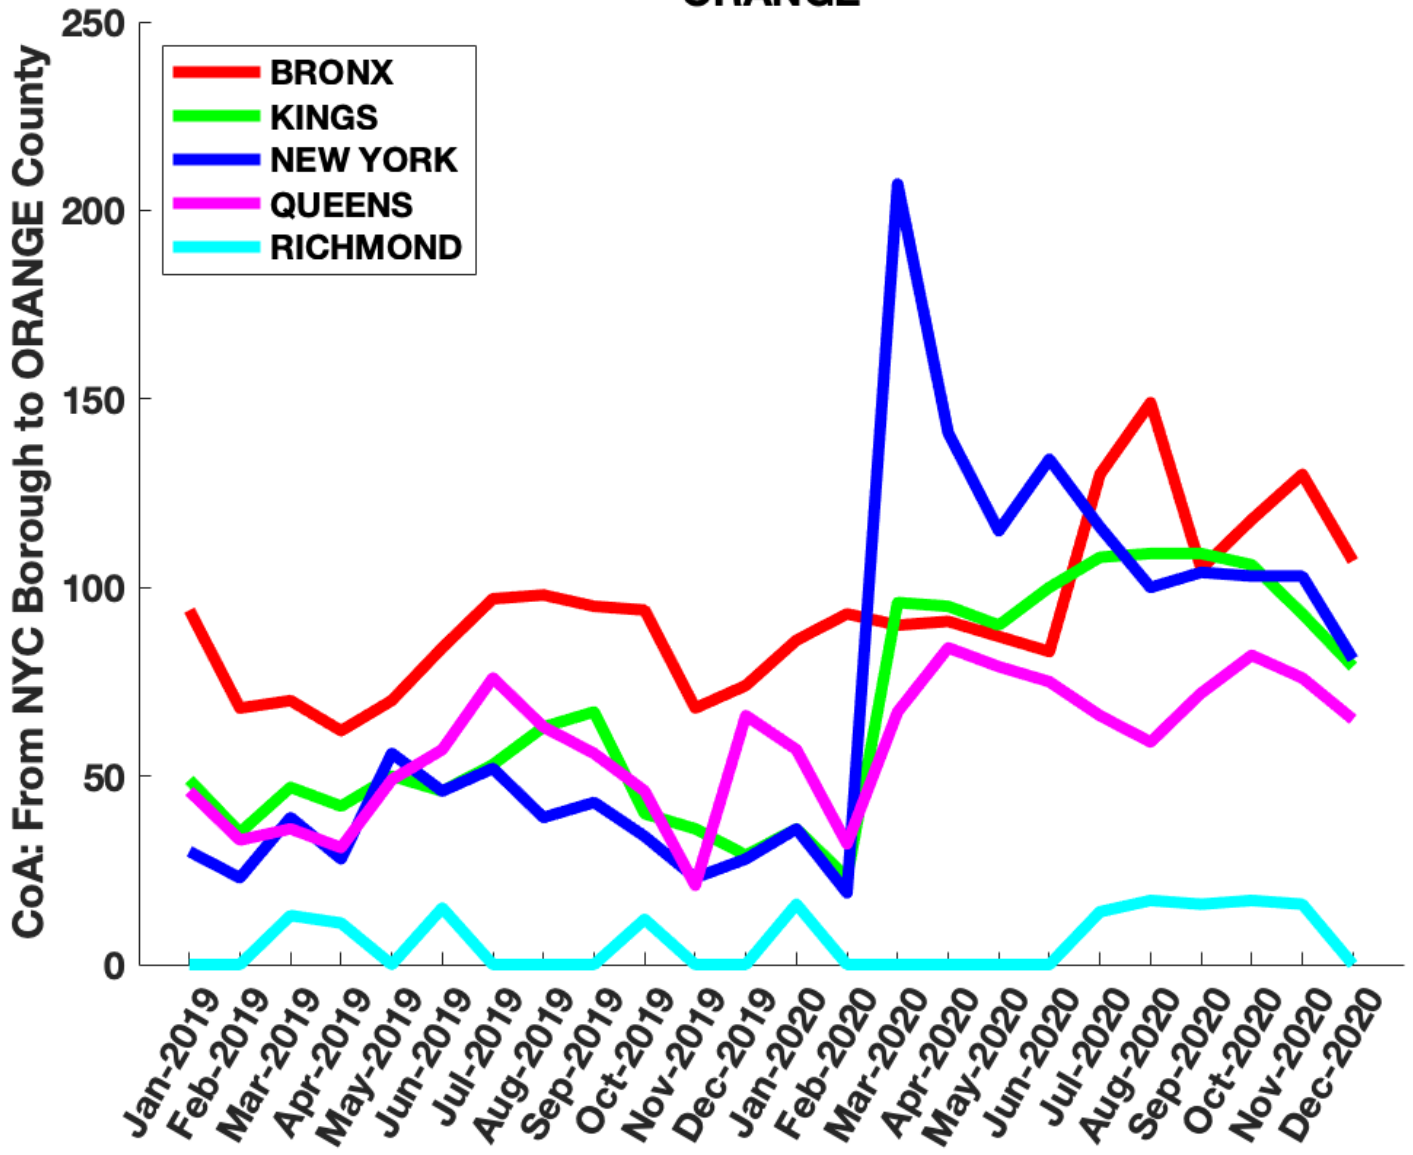

# DUTCHESS

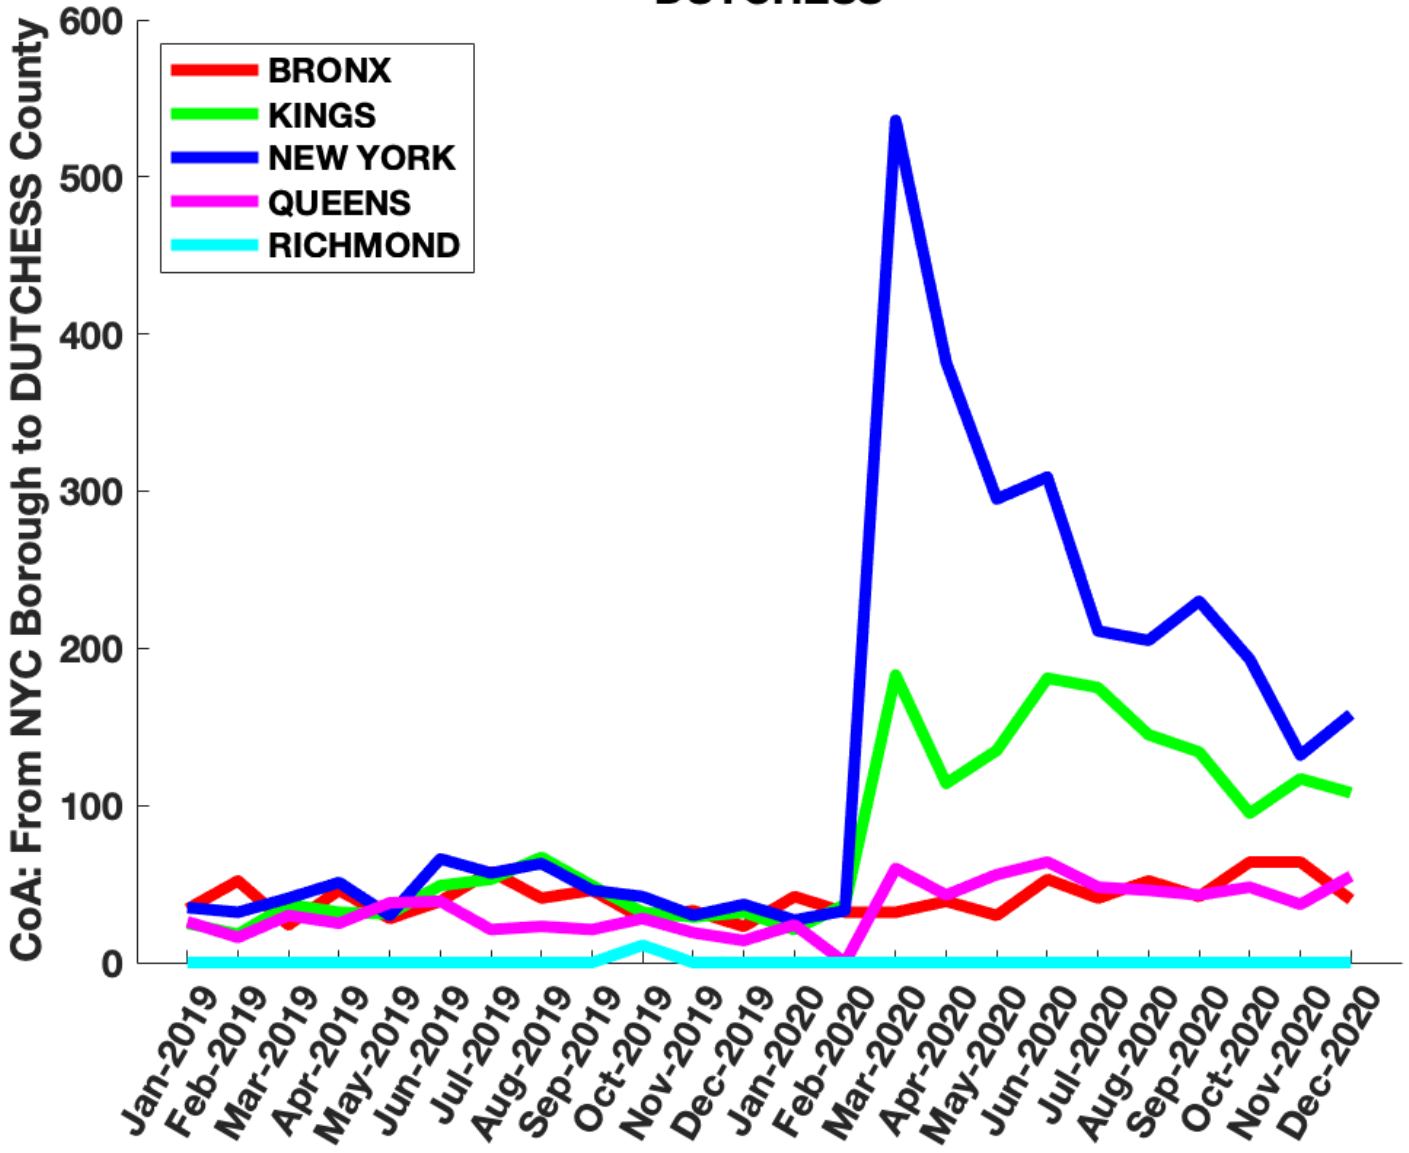

# ULSTER

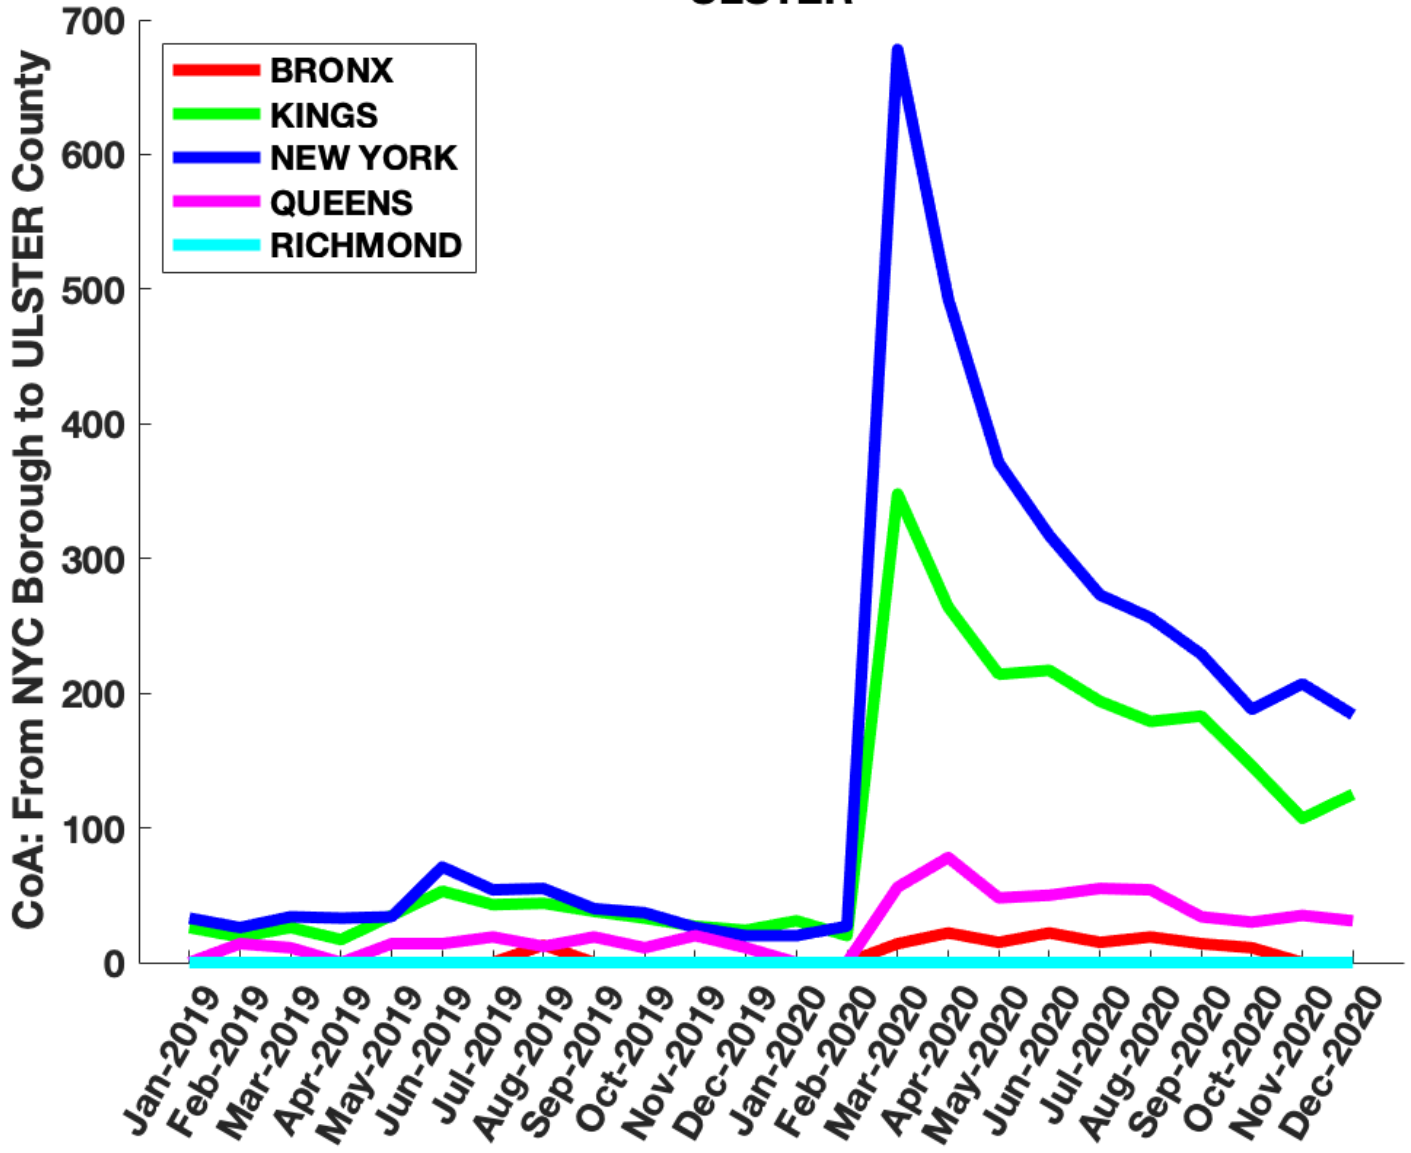



# SULLIVAN

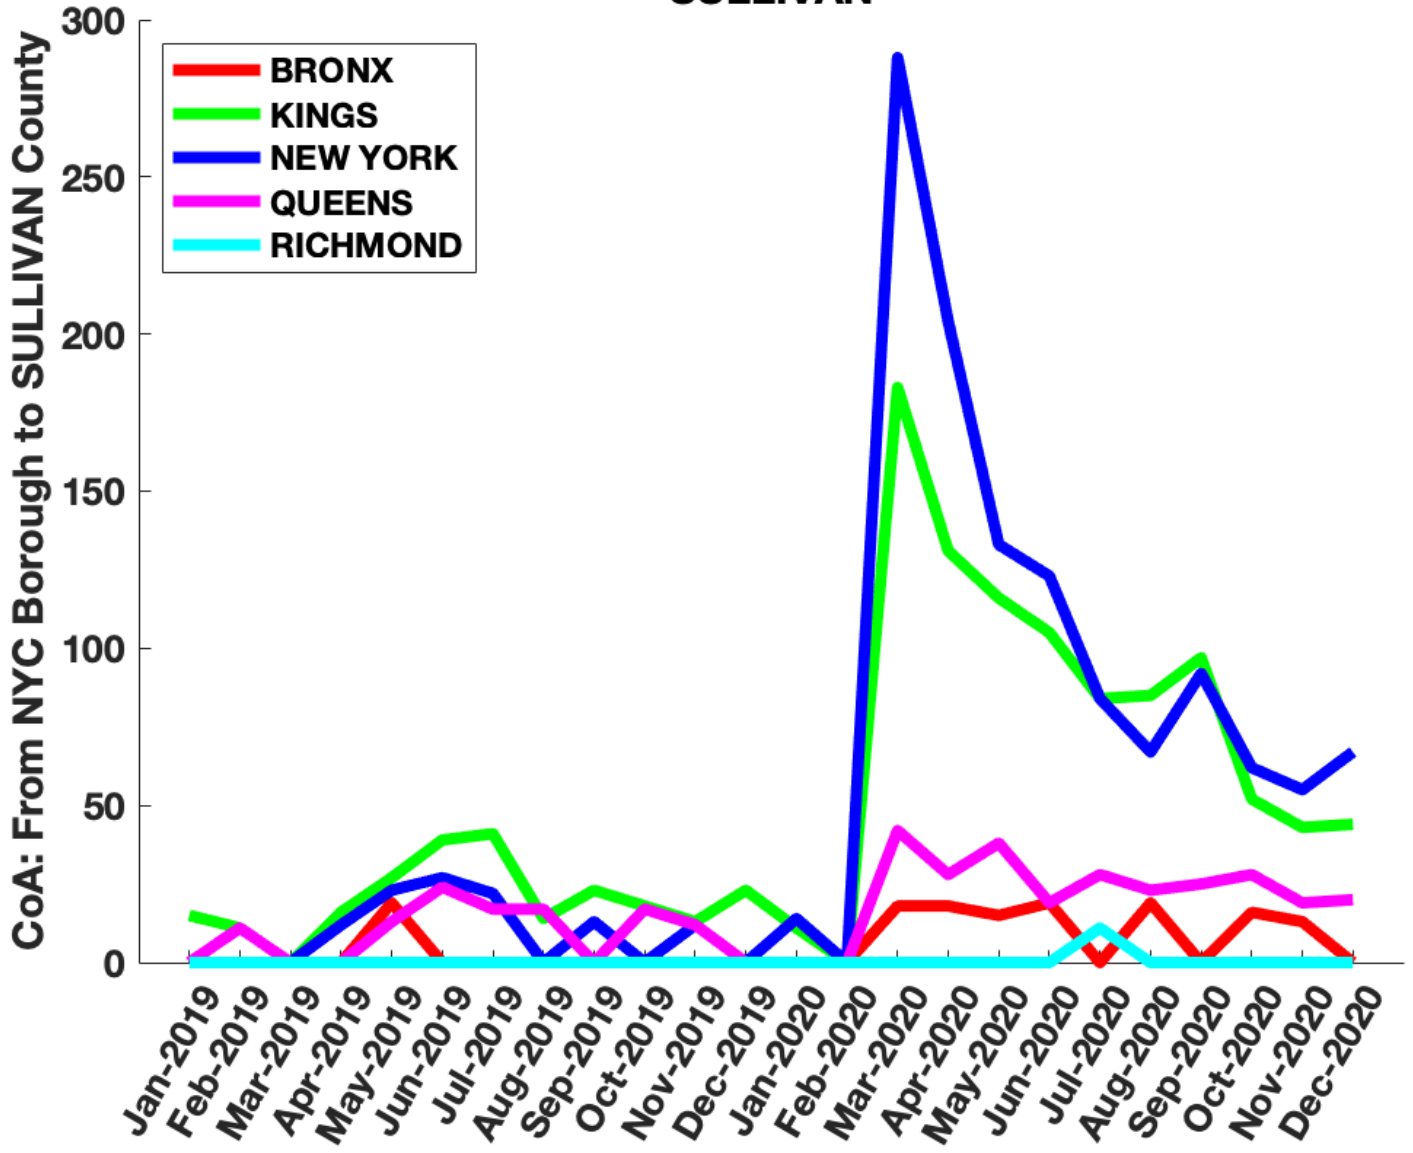

Supplement: Supplementary file [file media-5.pdf]
