# Supplementary material for: Migration of households from New York City and the Second Peak in Covid-19 cases in New Jersey, Connecticut and New York Counties
Source: bioRxiv or medRxiv preprint supplement (doi:10.1101/2021.03.29.21254583), 2021-03-31

# BRONX

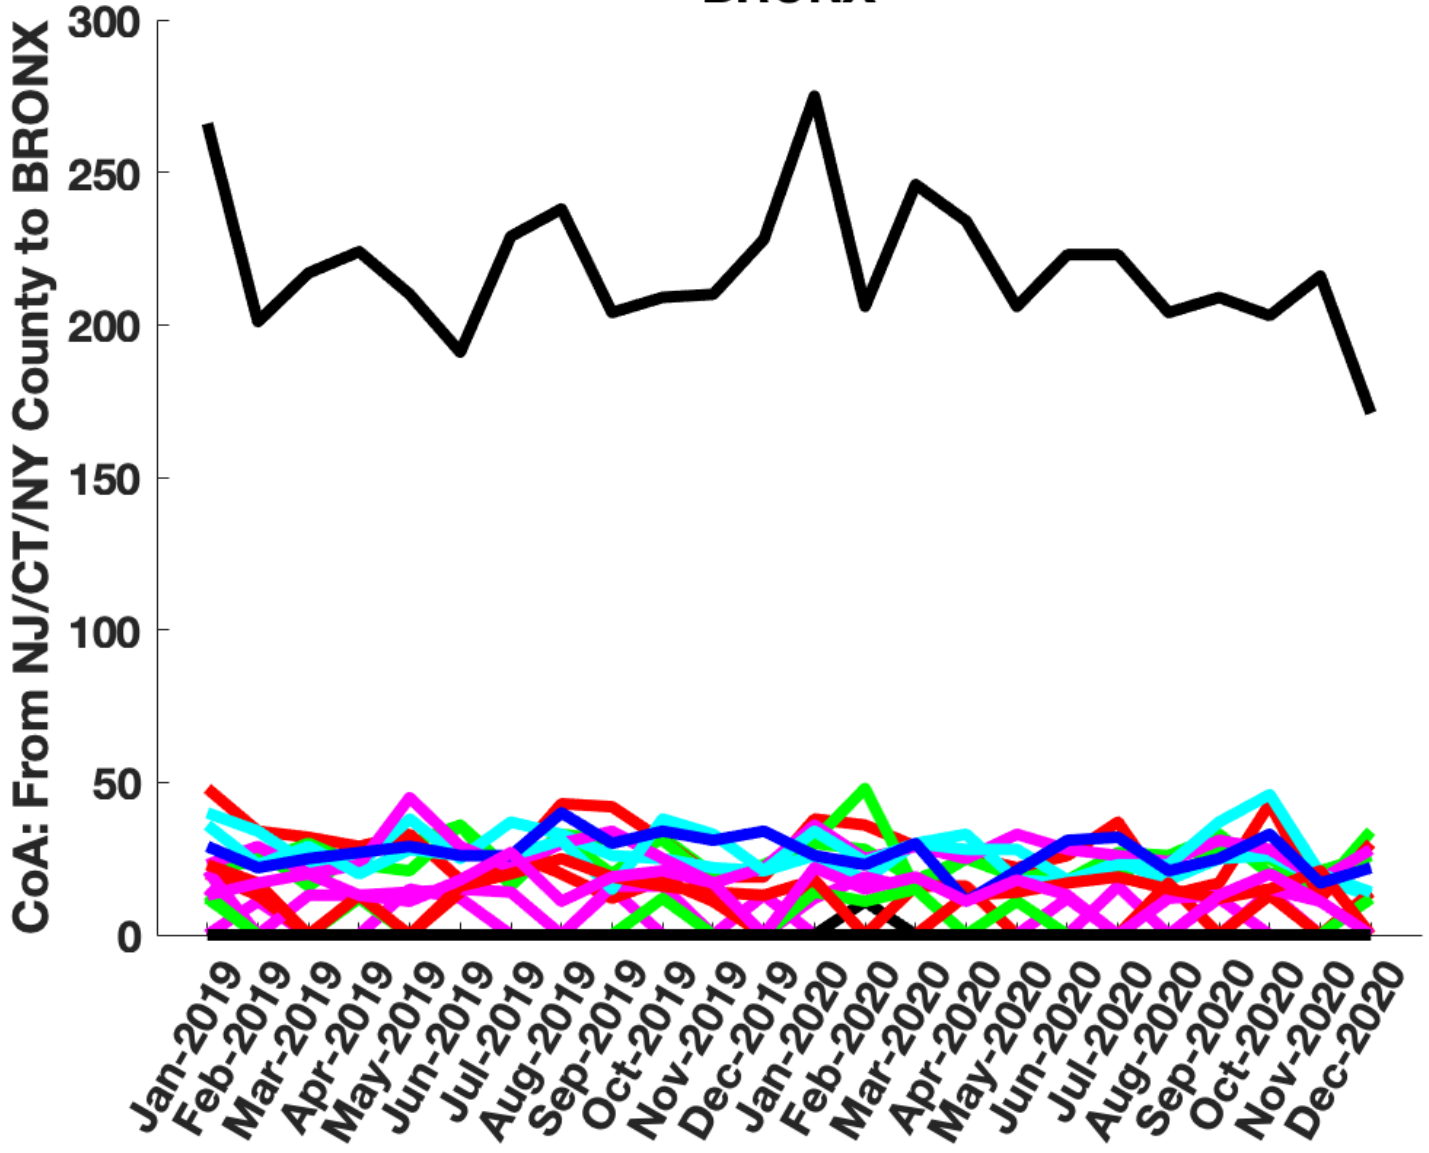

# KINGS

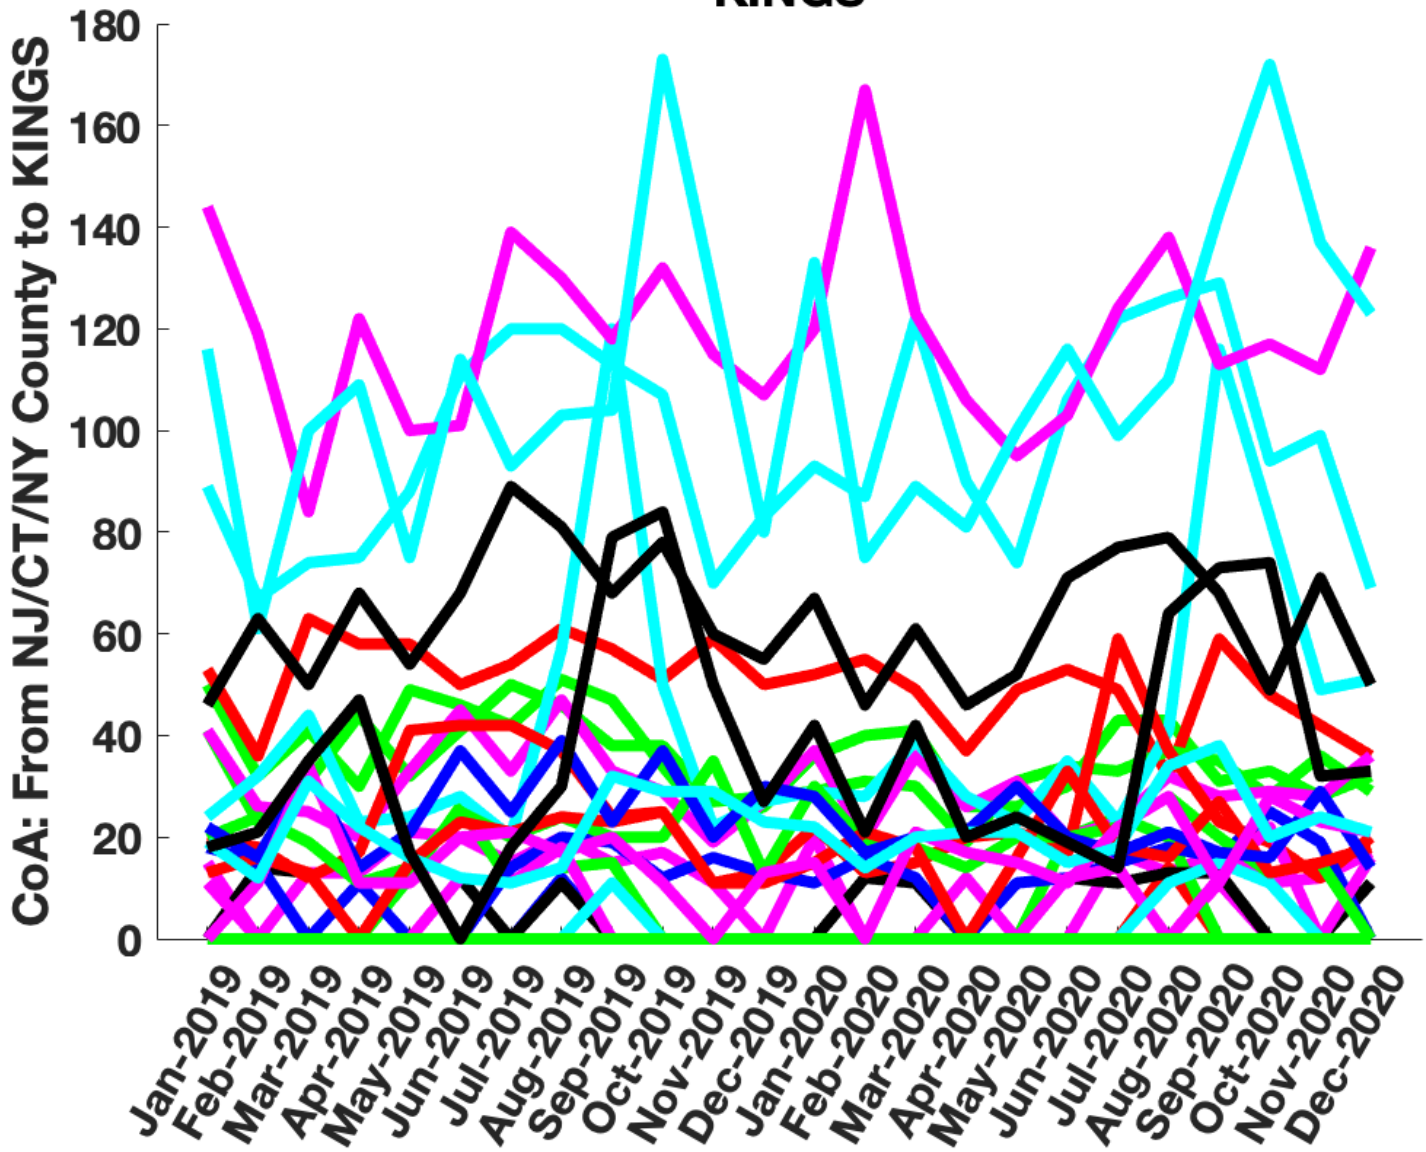

CoA: From NJ/CT/NY County to NEW YORK

### NEW YORK

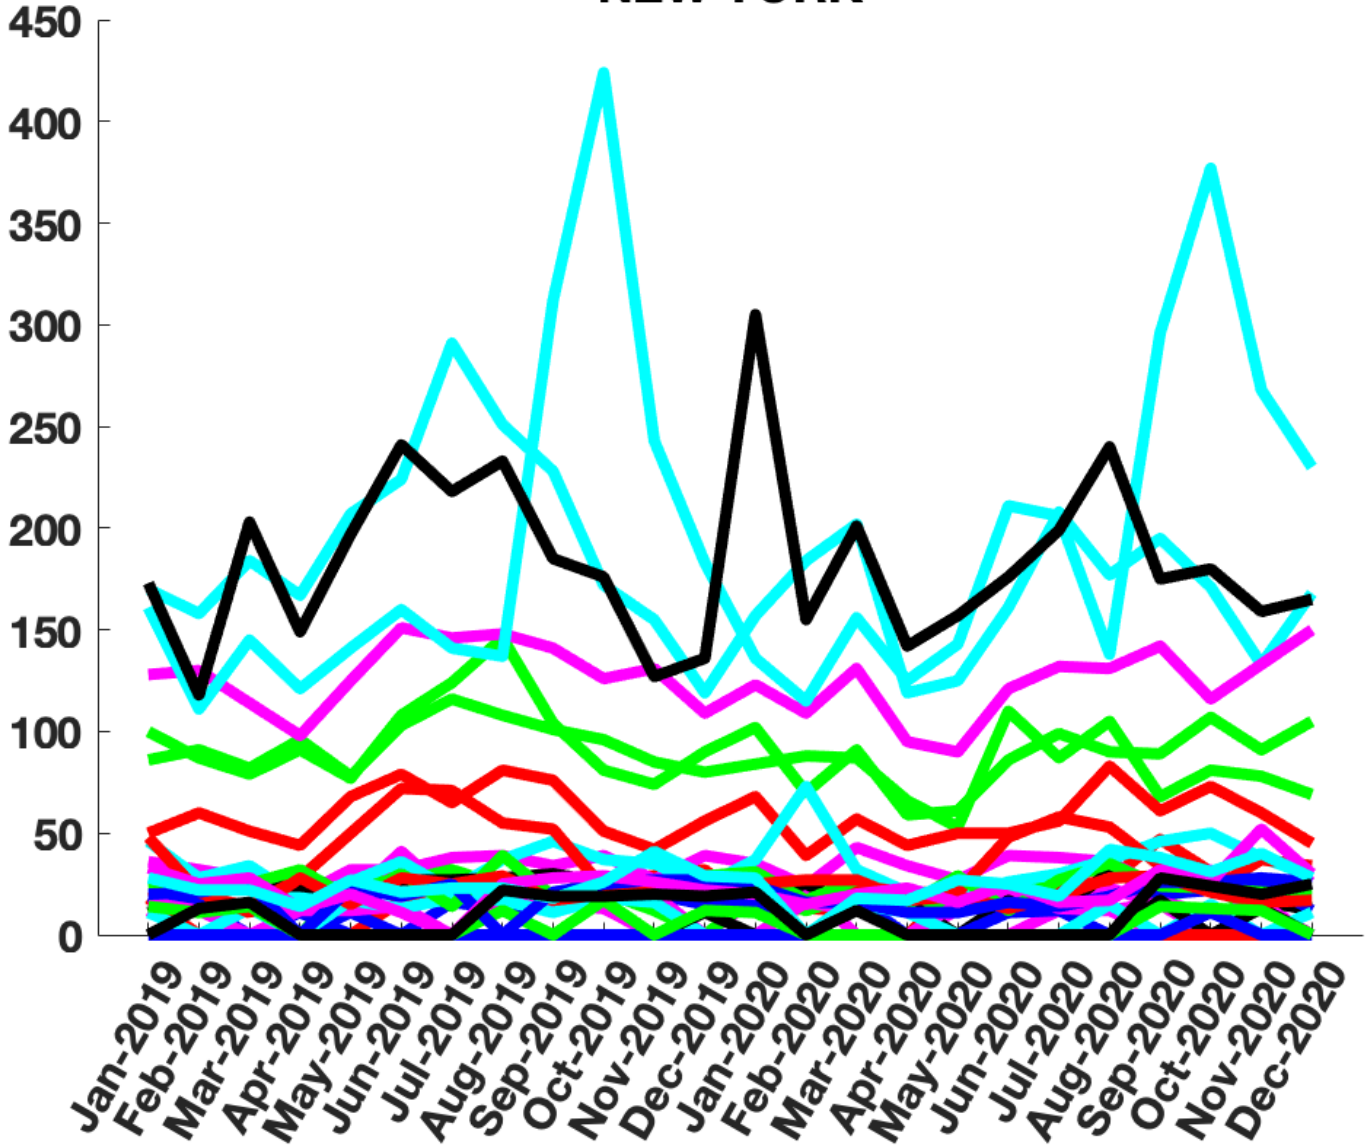

# QUEENS

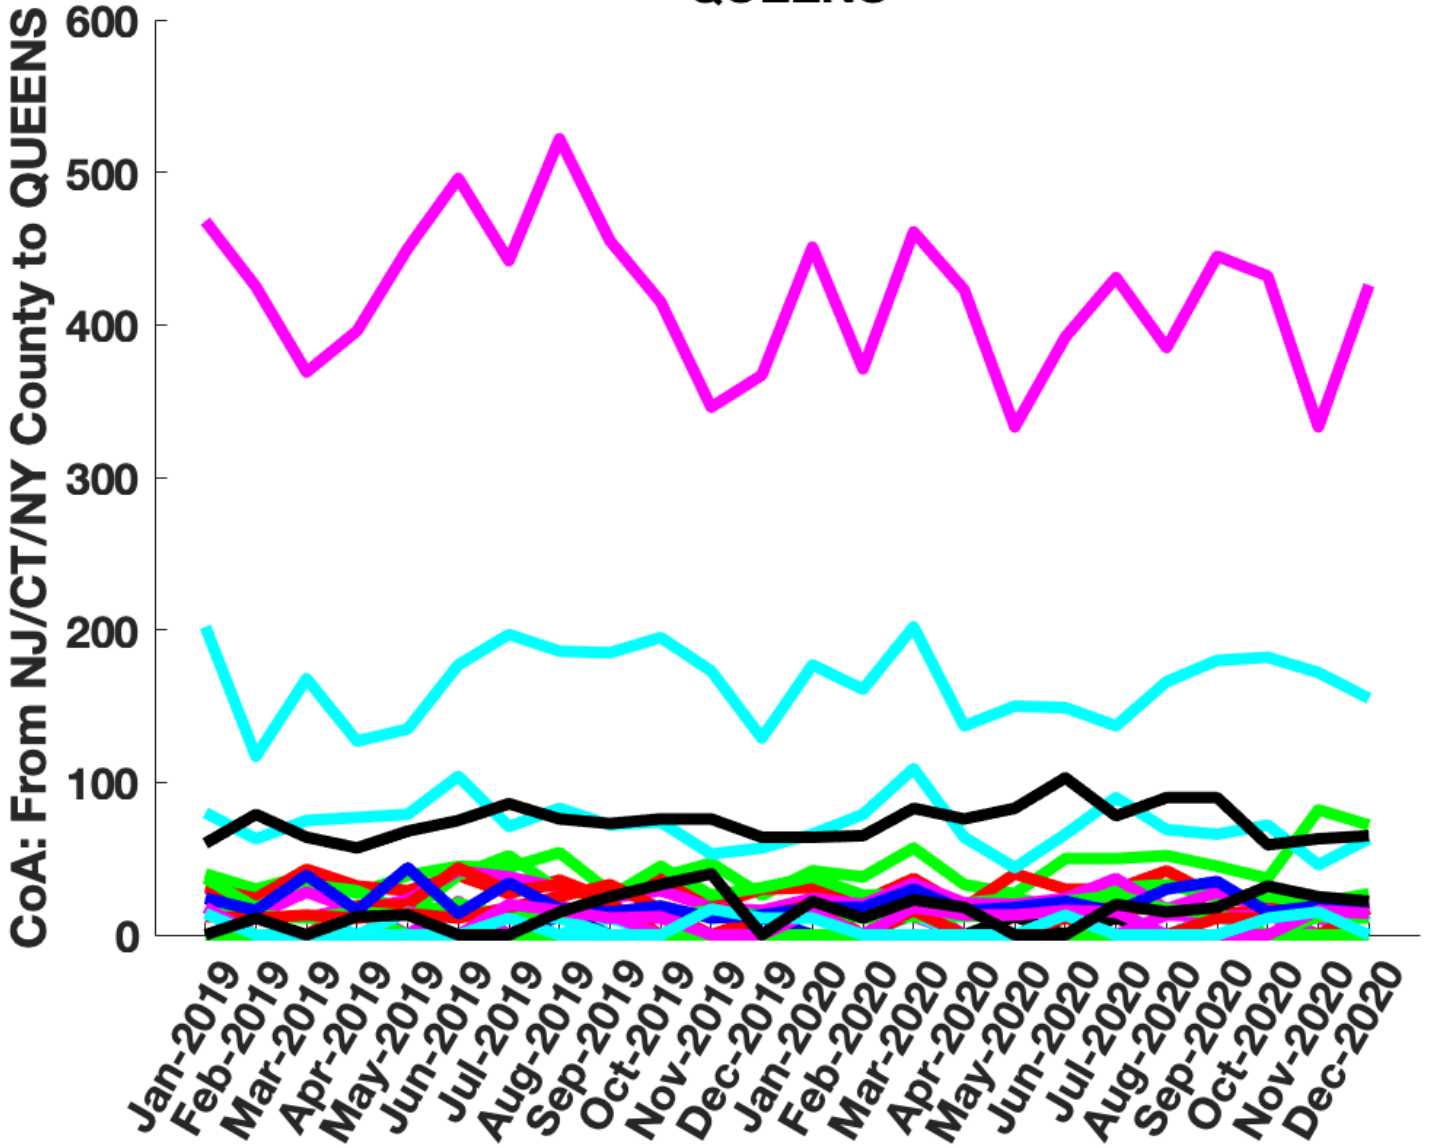

# RICHMOND

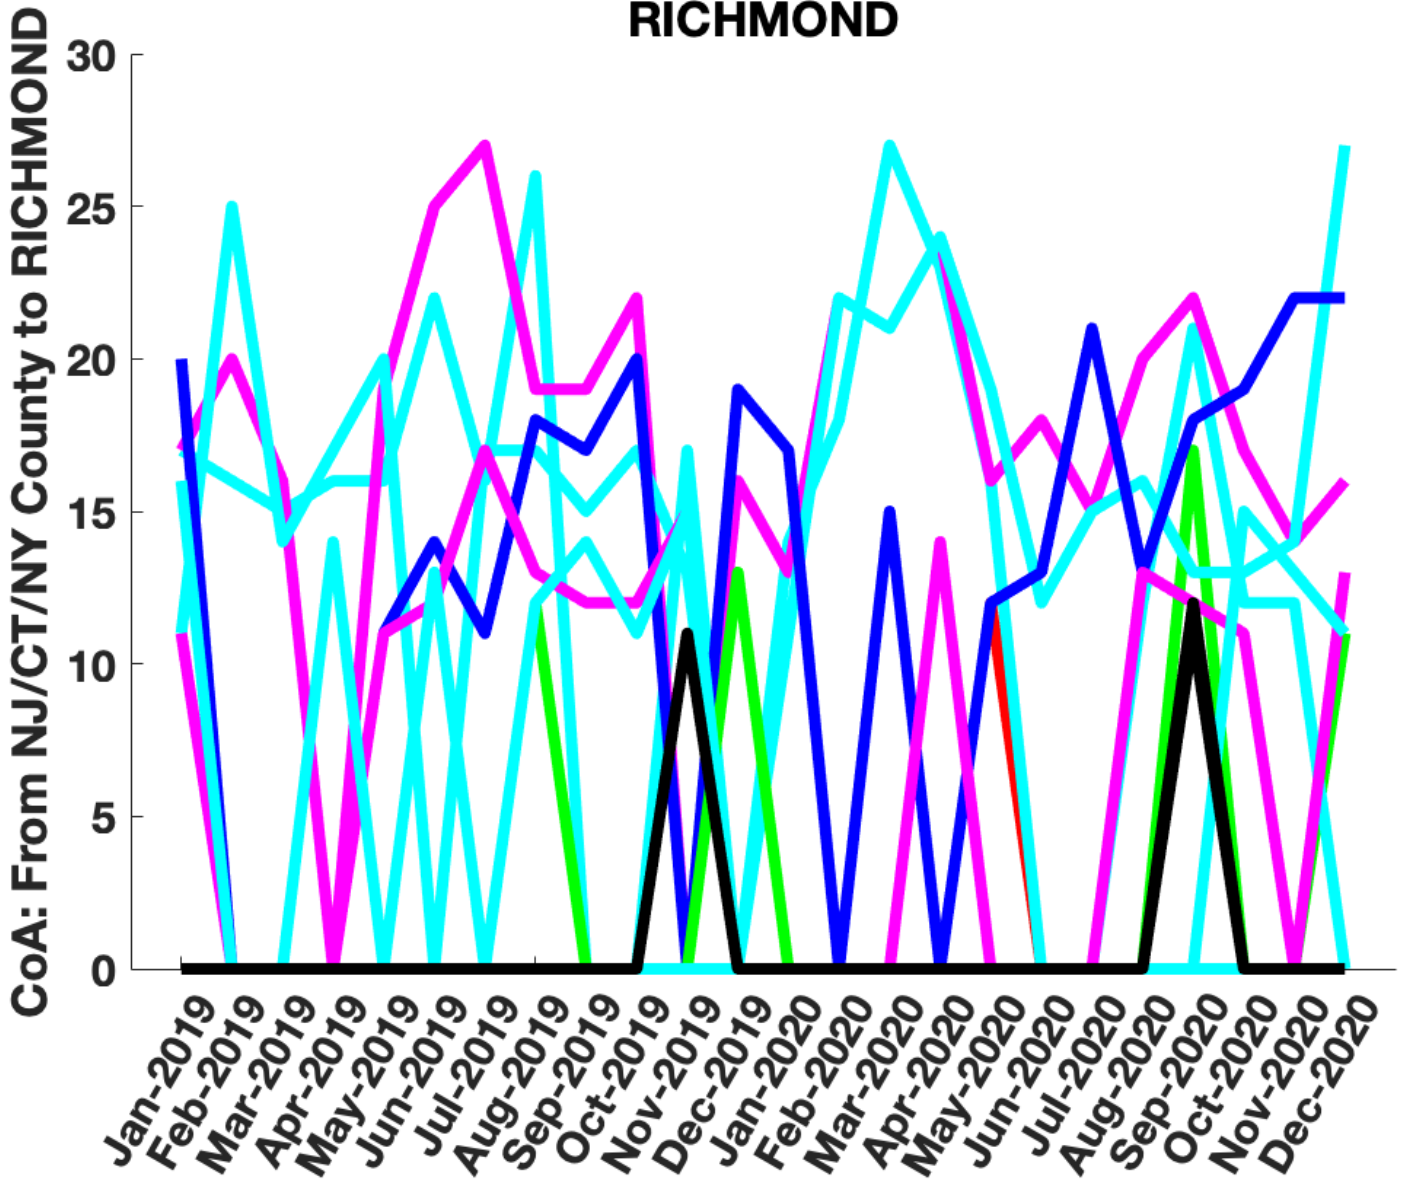

Supplement: Supplementary file [file media-6.pdf]
