# Supplementary material for: Migration of households from New York City and the Second Peak in Covid-19 cases in New Jersey, Connecticut and New York Counties
Source: bioRxiv or medRxiv preprint supplement (doi:10.1101/2021.03.29.21254583), 2021-03-31

# FAIRFIELD

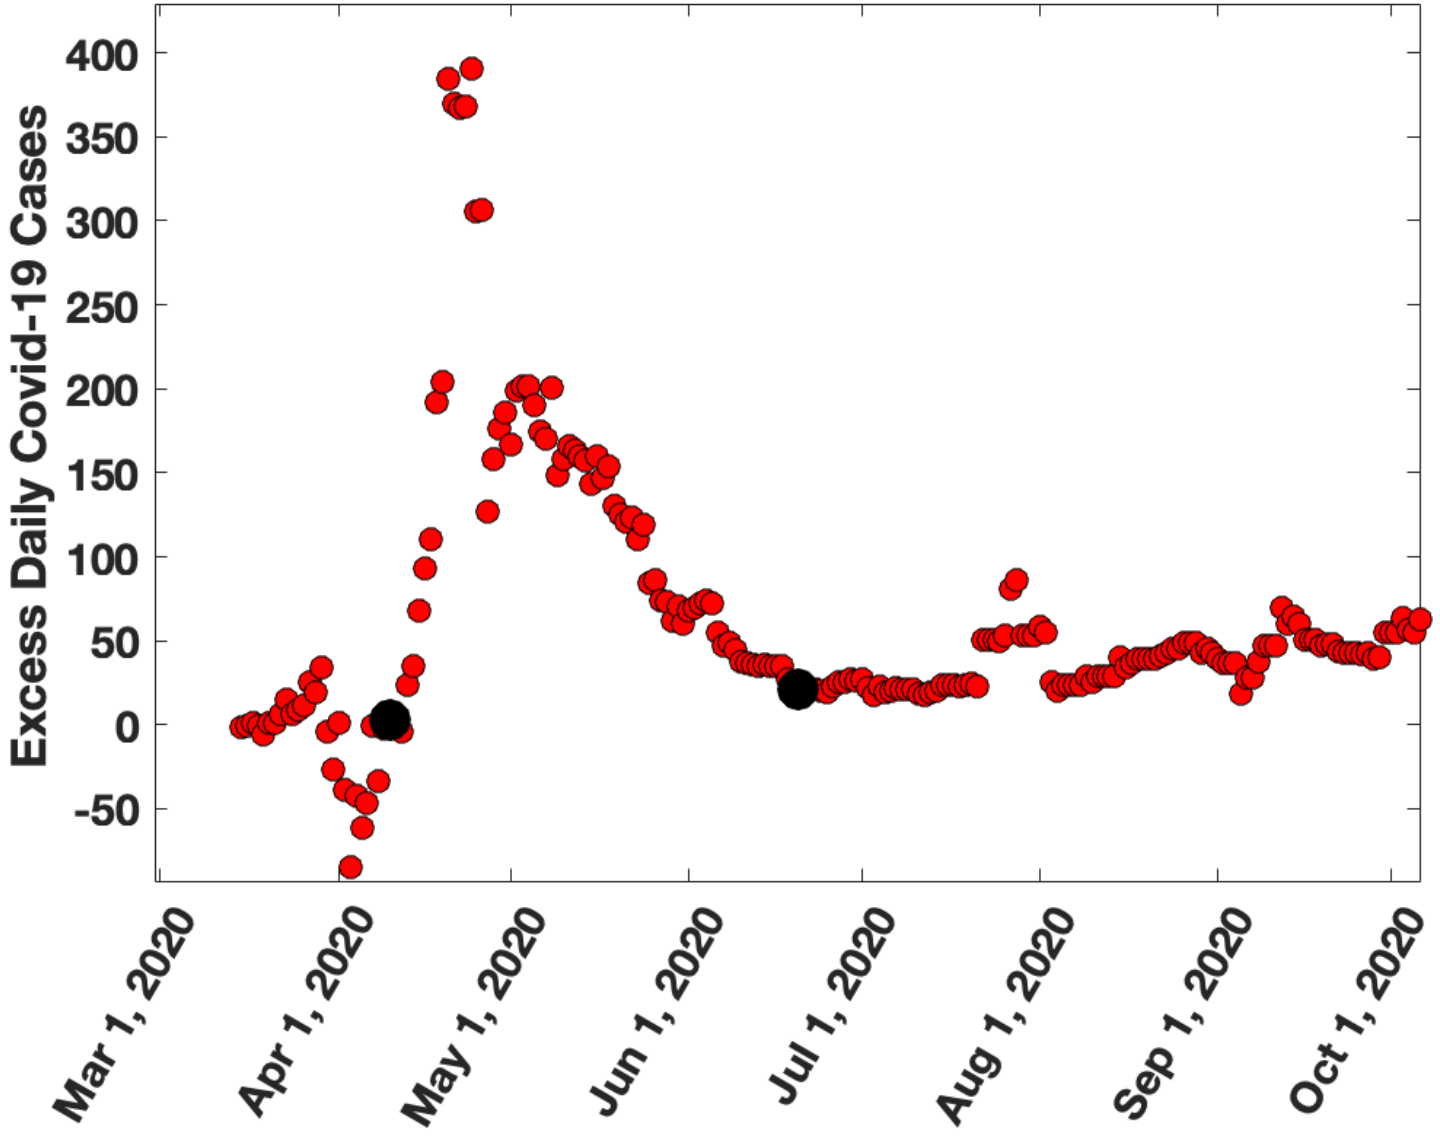

# HARTFORD

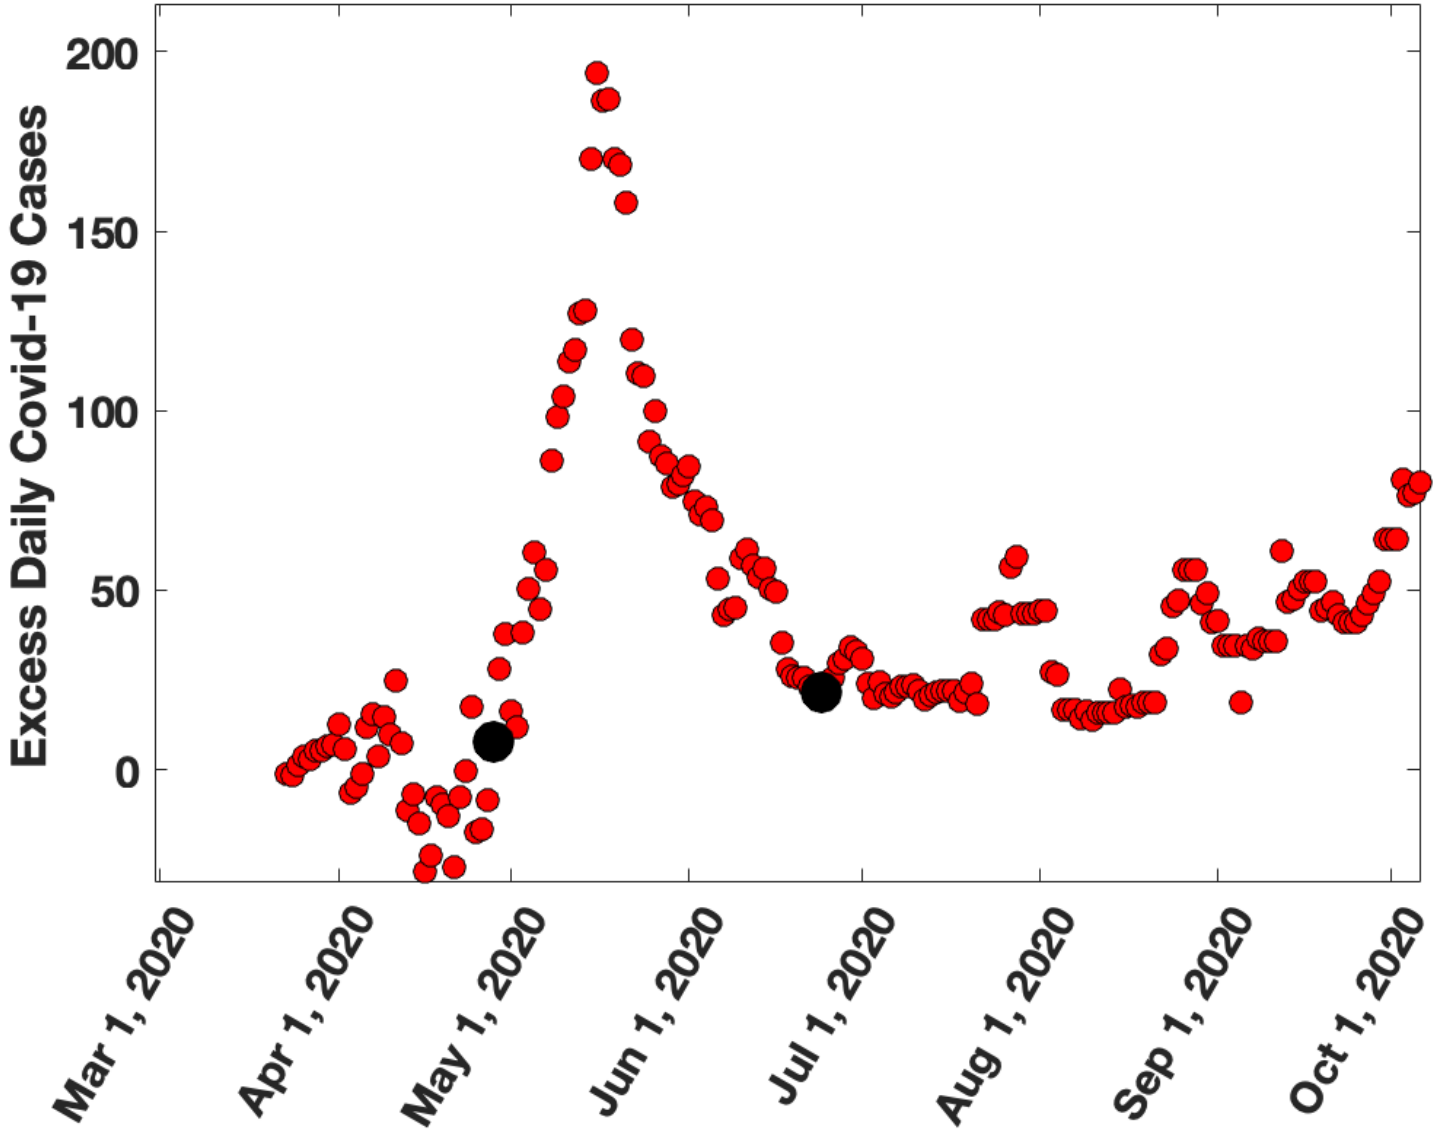

# LITCHFIELD

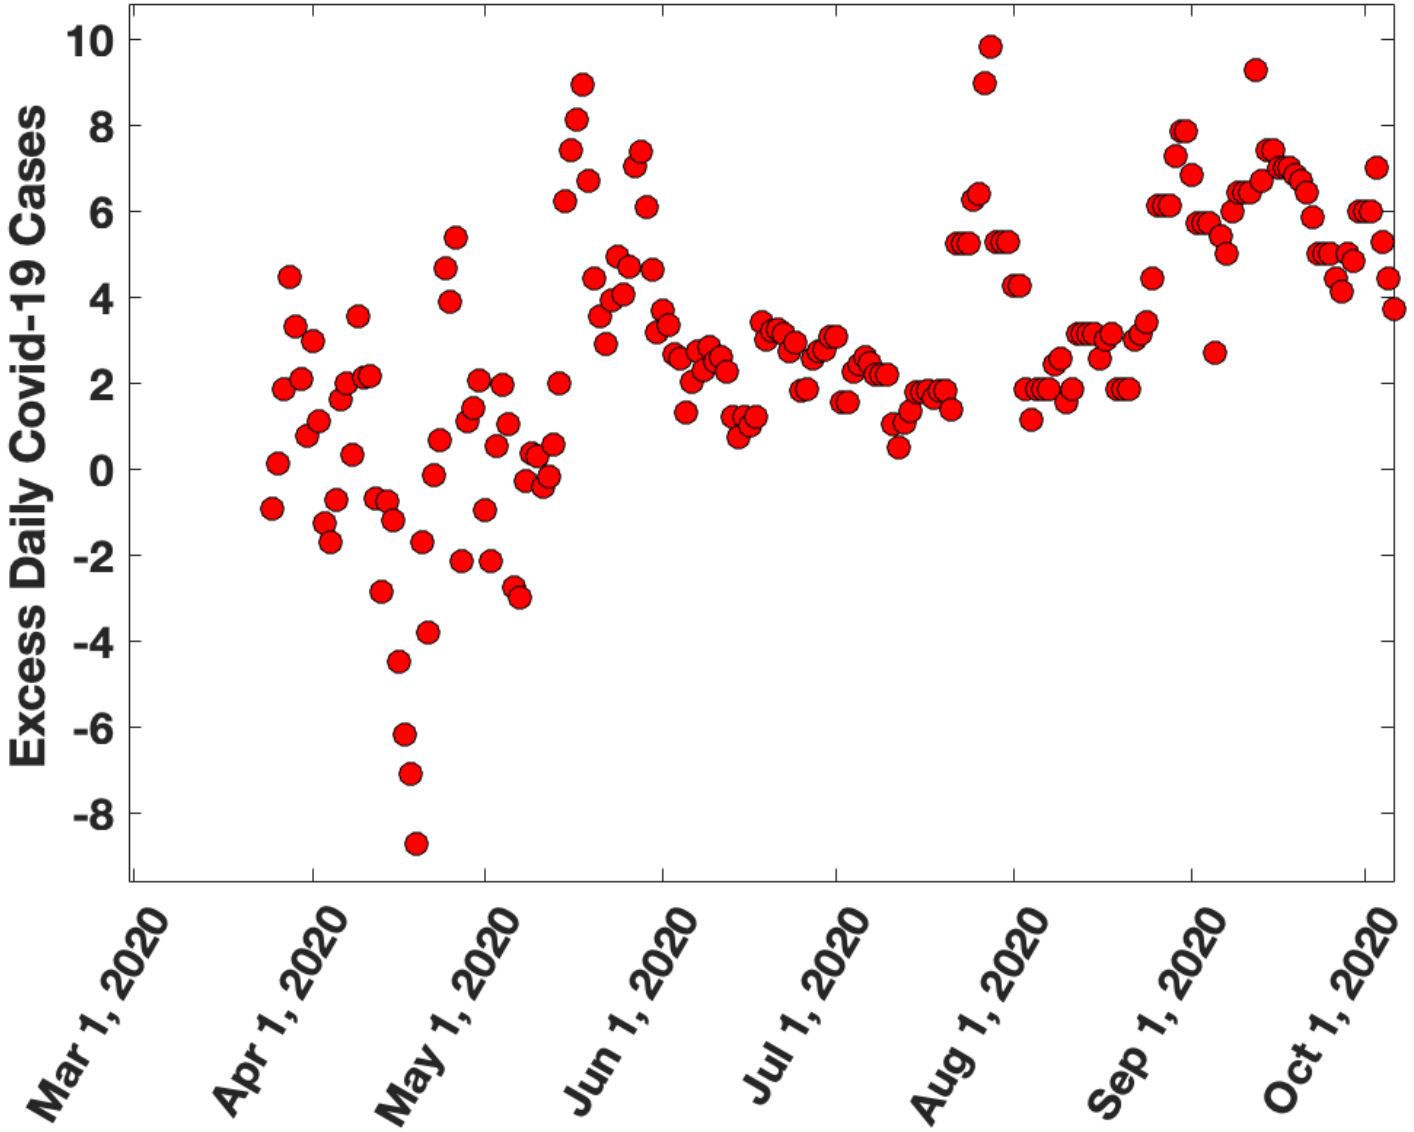

# MIDDLESEX(CT)

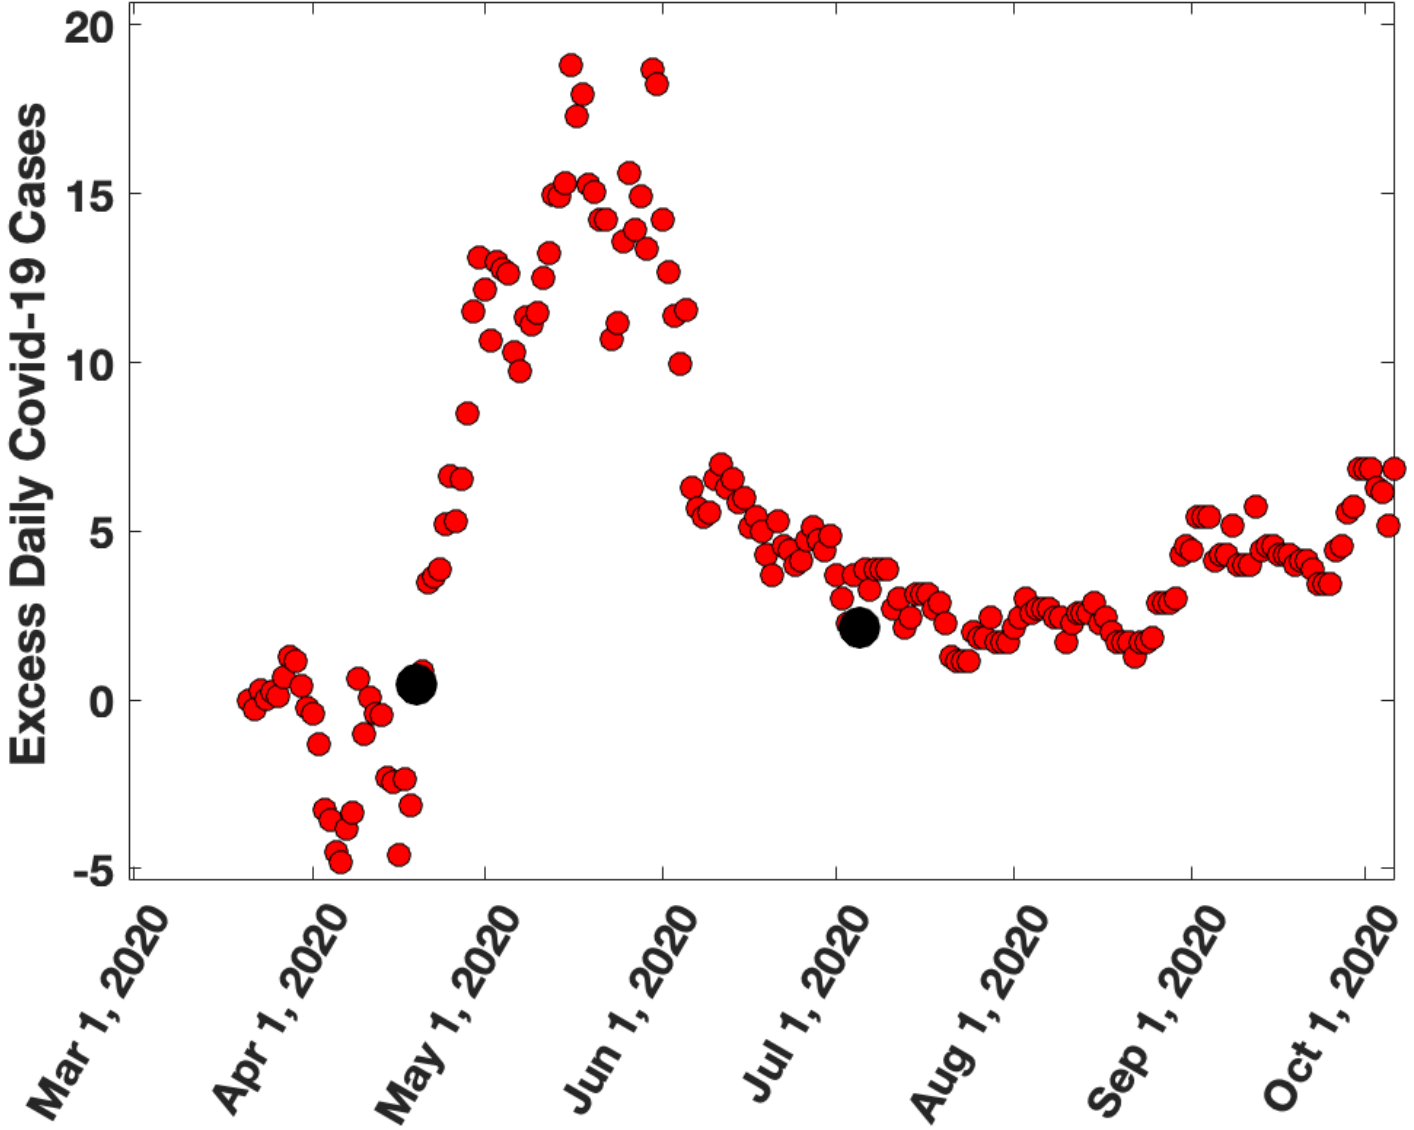

# NEW HAVEN

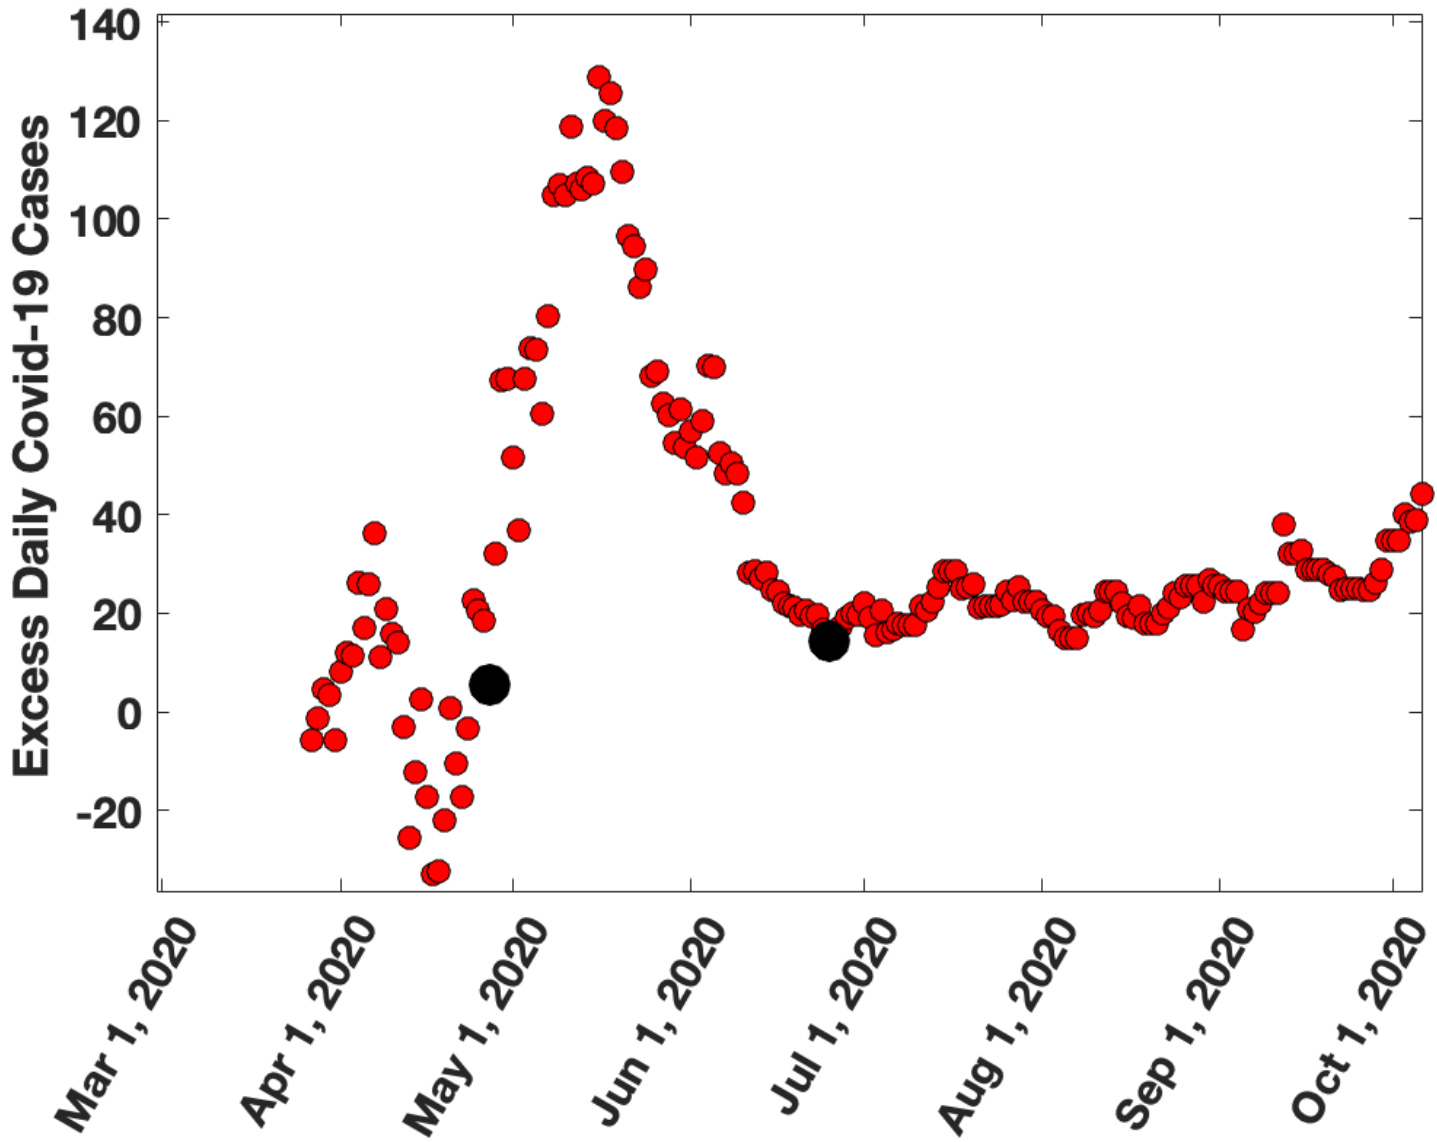

# NEW LONDON

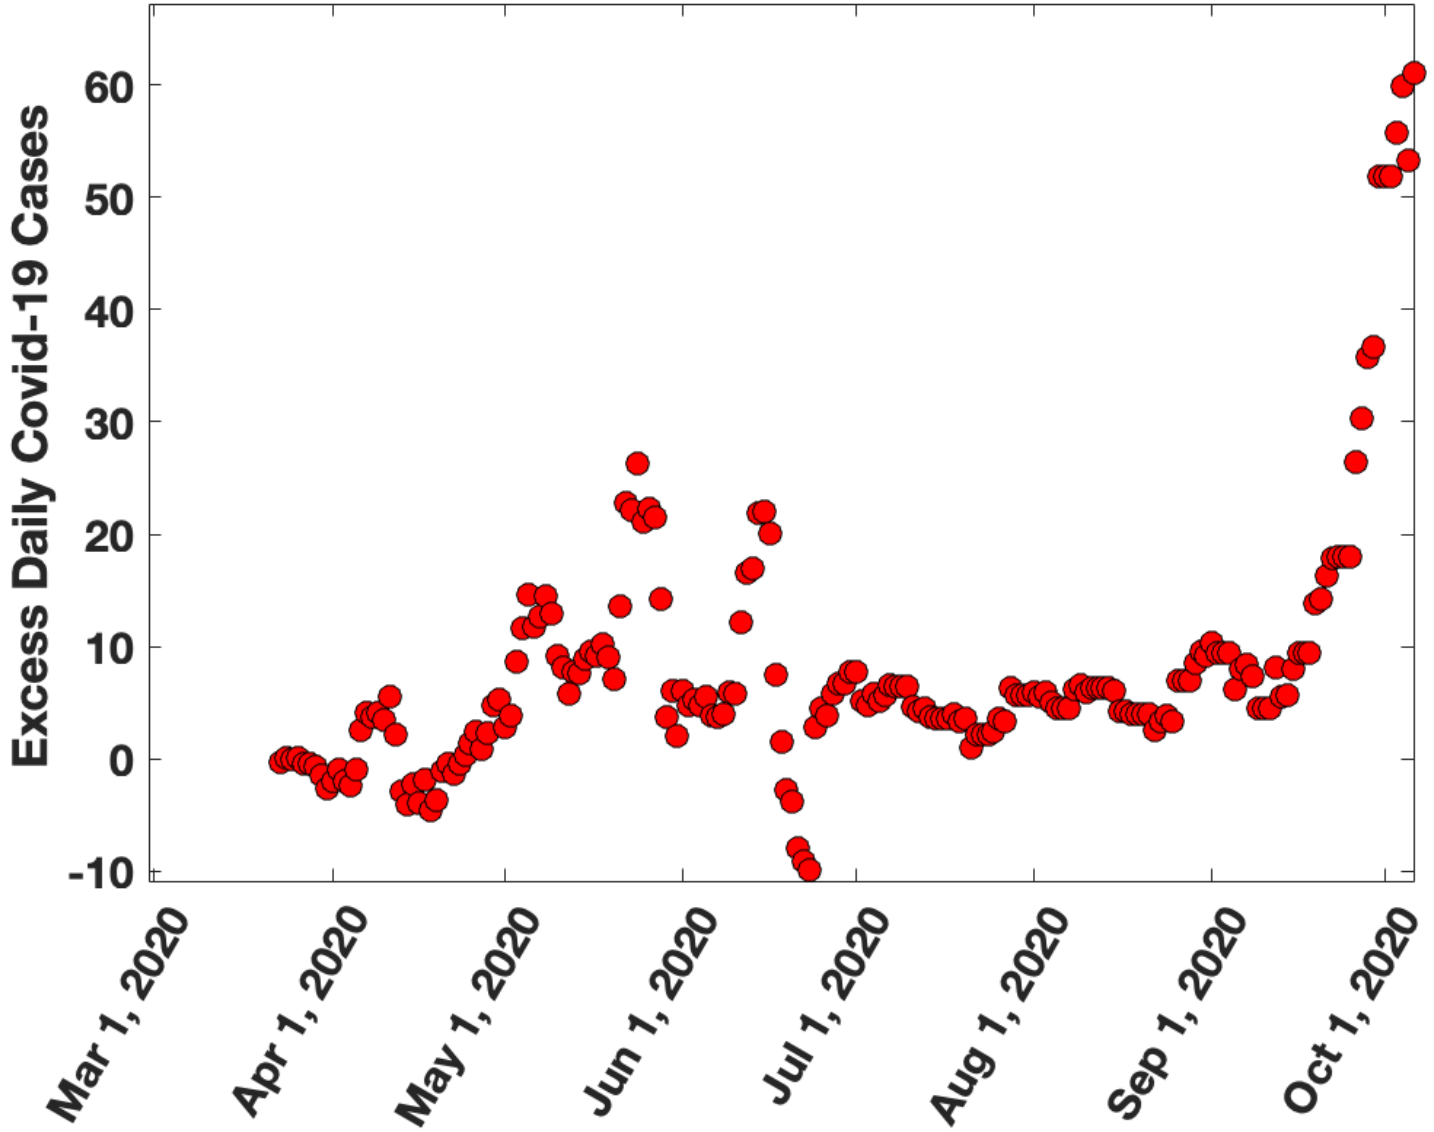

# TOLLAND

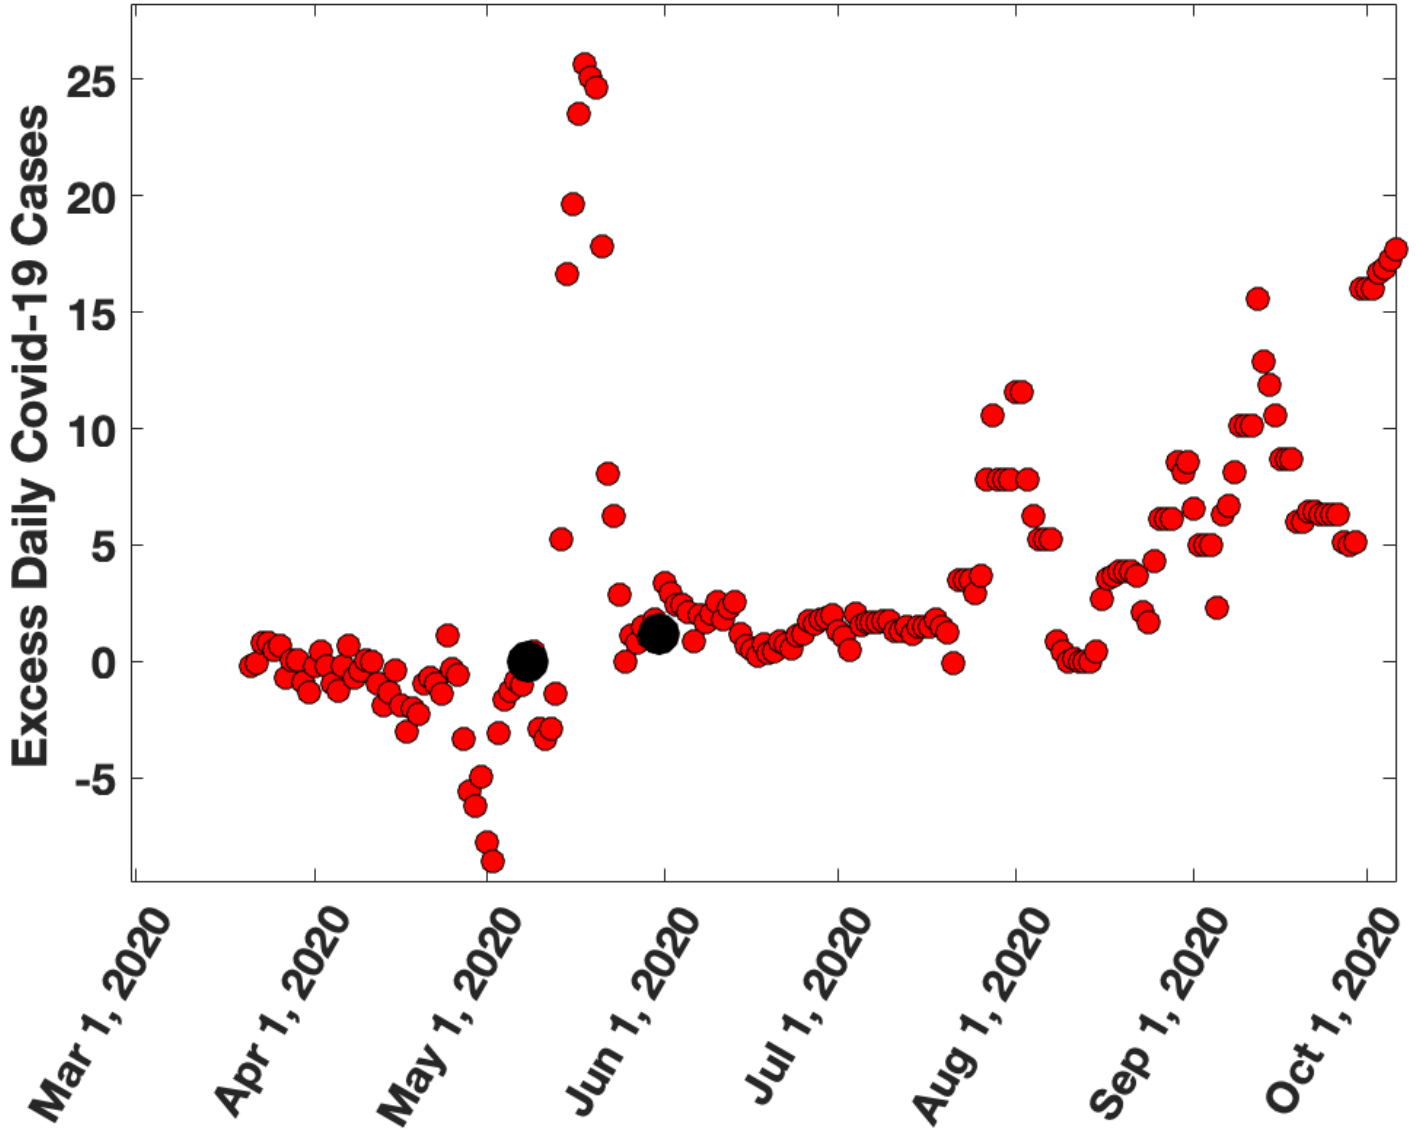

# WINDHAM

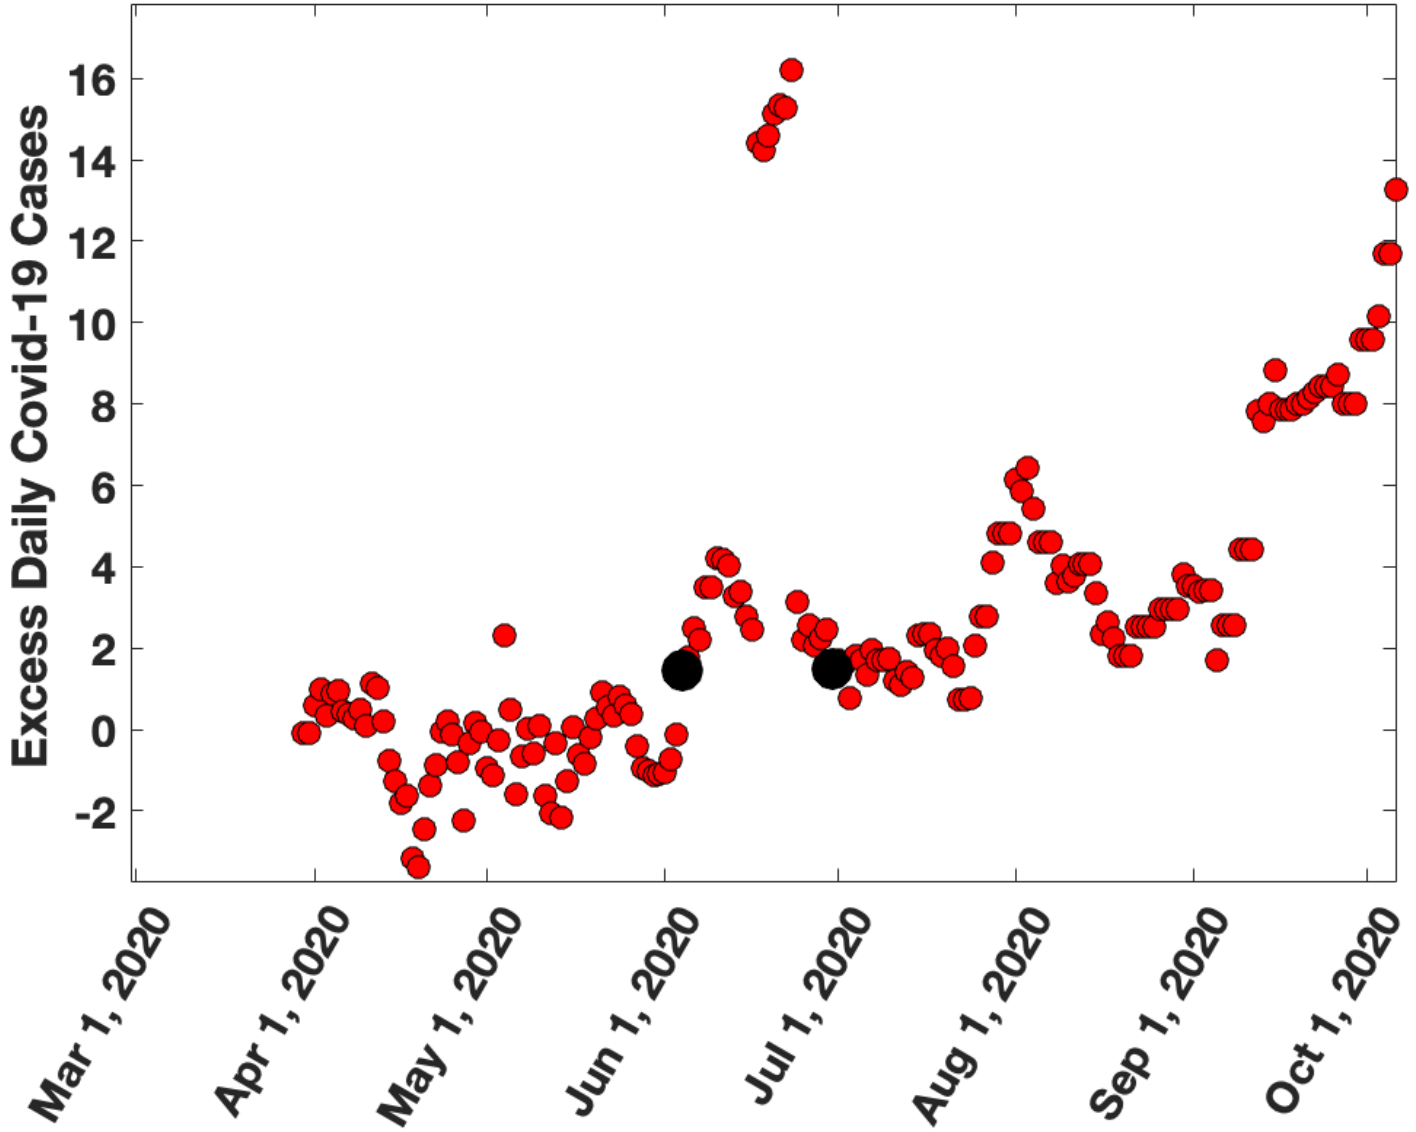

Supplement: Supplementary file [file media-10.pdf]
